# Supplementary material for: Chemical Toolkit for PARK7: Potent, Selective, and High-Throughput
Source: PubMed Central journal article supplement (PMC9574860; doi:10.1021/acs.jmedchem.2c01113), 2022-09-23

SUPPORTING INFORMATION

**Chemical Toolkit for PARK7:  
Potent, Selective and High-Throughput**

**Yuqing Jia,<sup>a</sup> Robbert Q. Kim,<sup>a</sup> Raymond Kooij,<sup>a</sup> Huib Ovaa,<sup>a</sup> Aysegul Sapmaz,<sup>\*a</sup> and Paul P. Geurink<sup>\*a</sup>**

<sup>a</sup> Oncode Institute & Department of Cell and Chemical Biology, Leiden University Medical Center, Einthovenweg 20, 2333 ZC, Leiden, The Netherlands

\* Corresponding authors: [p.p.geurink@lumc.nl](mailto:p.p.geurink@lumc.nl), [a.sapmaz@lumc.nl](mailto:a.sapmaz@lumc.nl)

## Contents

|                                                                                                                                                                                    |    |
|------------------------------------------------------------------------------------------------------------------------------------------------------------------------------------|----|
| Table S1. Data processing and refinement statistics for the PARK7-inhibitor cocrystal structures. ....                                                                             | 3  |
| Table S2. Structures overview of fragments for hit validation. ....                                                                                                                | 4  |
| Figure S1. Electron density maps of (A) PARK7- <b>8RK64</b> (PDB: 7PA2) and (B) PARK7- <b>JYQ-88</b> (PDB: 7PA3) co-crystal structures.....                                        | 8  |
| Figure S2. Inhibitory activity of <b>8RK64</b> towards PARK7.....                                                                                                                  | 9  |
| Figure S3. IC <sub>50</sub> determination of <b>STK793590</b> for PARK7 by DiFMUAc assay.....                                                                                      | 10 |
| Figure S4. IC <sub>50</sub> determination of <b>JYQ-92</b> , <b>JYQ-93</b> , and <b>JYQ-107</b> for UCHL1 using Ub-AMC as the substrate. ....                                      | 11 |
| Figure S5. Fluorescence labeling of DUBs to investigate their remaining activity by Rh-Ub-PA after the treatment with PARK7 inhibitor <b>JYQ-88</b> and probe <b>JYQ-92</b> . .... | 12 |
| Figure S6. The development of the FP assay. ....                                                                                                                                   | 13 |
| Figure S7. Change in FP value over time at different concentrations of inhibitor <b>JYQ-55</b> . ....                                                                              | 14 |
| Figure S8. Heatmap displaying the validation of hits using the DiFMUAc assay.....                                                                                                  | 15 |
| Figure S9. Uncropped and unprocessed gel images in Figure 4. ....                                                                                                                  | 16 |
| Figure S10. Uncropped and unprocessed gel images in Figure 6E.....                                                                                                                 | 18 |
| Synthesis of <b>STK793590</b> .....                                                                                                                                                | 19 |
| Synthesis of <b>DiFMUAc</b> assay reagent.....                                                                                                                                     | 19 |
| NMR spectra .....                                                                                                                                                                  | 20 |
| LC-MS of synthesized compounds .....                                                                                                                                               | 35 |

**Table S1.** Data processing and refinement statistics for the PARK7-inhibitor cocrystal structures.

|                                                                     | <b>PARK7 +8RK64</b>                                        | <b>PARK7 +JYQ-88</b>                                            |
|---------------------------------------------------------------------|------------------------------------------------------------|-----------------------------------------------------------------|
| Crystallization conditions                                          | 0.1 M Bicine pH 9.0<br>10% PEG 20000<br>2% w/v 1,4-Dioxane | 0.1 M Ammonium sulfate<br>0.1 M Bis-Tris pH 5.5<br>25% PEG 3350 |
| PDB accession code                                                  | 7PA2                                                       | 7PA3                                                            |
| Space group                                                         | P 65 2 2                                                   | P 65 2 2                                                        |
| <i>Cell dimensions</i>                                              |                                                            |                                                                 |
| a (Å)                                                               | 66.86                                                      | 66.74                                                           |
| b (Å)                                                               | 66.86                                                      | 66.74                                                           |
| c (Å)                                                               | 179.69                                                     | 176.78                                                          |
| $\alpha$ (°)                                                        | 90                                                         | 90                                                              |
| $\beta$ (°)                                                         | 90                                                         | 90                                                              |
| $\gamma$ (°)                                                        | 120                                                        | 120                                                             |
| <i>Processing statistics</i>                                        |                                                            |                                                                 |
| Resolution (Å)                                                      | 59.90-1.21                                                 | 58.93-1.42                                                      |
| Outer shell (Å)                                                     | 1.23-1.21                                                  | 1.44-1.42                                                       |
| Beamline                                                            | DLS i24                                                    | DLS i04                                                         |
| Wavelength (Å)                                                      | 0.96871                                                    | 0.97996                                                         |
| Observed reflections                                                | 1324702 (34068)                                            | 1462173 (19490)                                                 |
| Unique reflections                                                  | 73359 (3558)                                               | 44987 (2131)                                                    |
| R <sub>pim</sub>                                                    | 0.028 (0.969)                                              | 0.033 (1.416)                                                   |
| CC(1/2)                                                             | 0.999 (0.447)                                              | 1 (0.335)                                                       |
| Multiplicity                                                        | 18.1 (9.6)                                                 | 32.5 (9.1)                                                      |
| Completeness                                                        | 100 (100)                                                  | 100 (98.9)                                                      |
| Mean (I/ $\sigma$ (I))                                              | 16.1 (1.2)                                                 | 17.5 (0.8)                                                      |
| <i>Refinement statistics</i>                                        |                                                            |                                                                 |
| Monomers in ASU                                                     | 1                                                          | 1                                                               |
| No of protein atoms                                                 | 1384                                                       | 1380                                                            |
| R <sub>work</sub>                                                   | 0.132                                                      | 0.157                                                           |
| R <sub>free</sub>                                                   | 0.155                                                      | 0.194                                                           |
| <i>RMSD from ideality</i>                                           |                                                            |                                                                 |
| Bond lengths (Å)                                                    | 0.0171                                                     | 0.0148                                                          |
| Bond angles (°)                                                     | 1.9326                                                     | 1.8544                                                          |
| Chiral volume (Å <sup>3</sup> )                                     | 0.1216                                                     | 0.1094                                                          |
| <i>Ramachandran plot</i>                                            |                                                            |                                                                 |
| Favoured (%)                                                        | 98.9                                                       | 98.9                                                            |
| Disallowed (%)                                                      | 0.5                                                        | 0                                                               |
| Average B-values (Å <sup>2</sup> )                                  | 21.0                                                       | 30                                                              |
| <i>Values within parentheses are for the outer resolution shell</i> |                                                            |                                                                 |

**Table S2.** Structures overview of fragments for hit validation.

| Compound | Enamine catalog ID | Structure                                                                            |
|----------|--------------------|--------------------------------------------------------------------------------------|
| F1       | Z1954803958        | 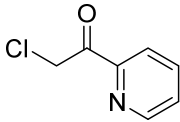   |
| F2       | Z802671642         |    |
| F3       | Z3236282166        |    |
| F4       | Z763366298         |    |
| F5       | Z2491497305        |    |
| F6       | Z2768504793        |  |
| F7       | Z2492395560        |  |
| F8       | Z2491498268        |  |
| F9       | Z235333089         |  |
| F10      | Z85923410          |  |

|     |            |                                                                                      |
|-----|------------|--------------------------------------------------------------------------------------|
| F11 | Z56922153  | 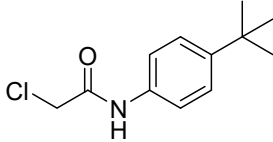   |
| F12 | Z56886389  |    |
| F13 | Z86023354  |    |
| F14 | Z56896308  |    |
| F15 | Z190662892 |   |
| F16 | Z220564178 |  |
| F17 | Z56886400  |  |
| F18 | Z56896170  |  |
| F19 | Z57051055  |  |

|     |             |                                                                                      |
|-----|-------------|--------------------------------------------------------------------------------------|
| F20 | Z1562123076 | 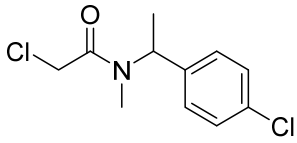   |
| F21 | Z1672273218 |    |
| F22 | Z1764361494 |    |
| F23 | Z3396482545 |    |
| F24 | Z2509451091 |    |
| F25 | Z1832812427 |   |
| F26 | Z1741956298 |  |
| F27 | Z1764398070 |  |
| F28 | Z1713569375 |  |
| F29 | Z1713569513 |  |

|     |             |                                                                                      |
|-----|-------------|--------------------------------------------------------------------------------------|
| F30 | Z1713568698 | 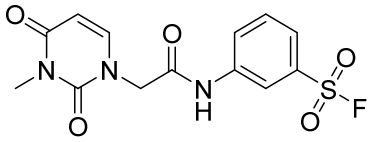   |
| F31 | Z1764375816 |    |
| F32 | Z3242849759 |    |
| F33 | Z3243697698 |    |
| F34 | Z3223579620 |    |
| F35 | Z2509462762 |   |
| F36 | Z2509450956 |  |
| F37 | Z3267389796 |  |
| F38 | Z2509455014 |  |
| F39 | Z1832812448 |  |
| F40 | Z1764309349 |  |

A

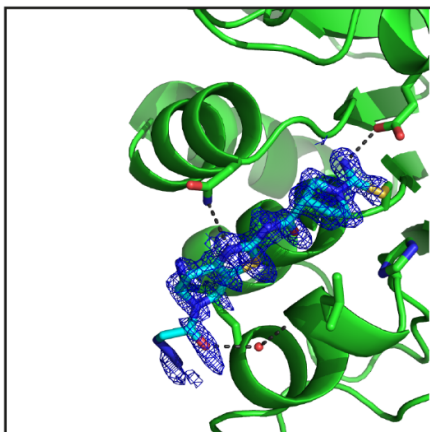

B

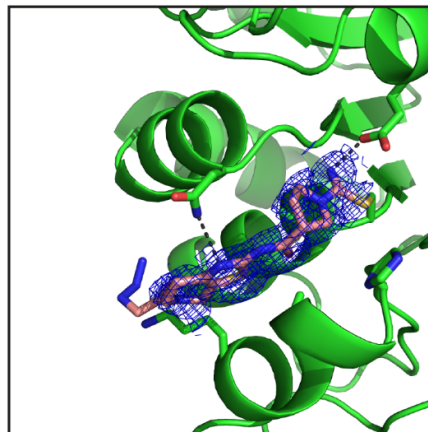

**Figure S1.** Electron density maps of (A) PARK7-**8RK64** (PDB: 7PA2) and (B) PARK7-**JYQ-88** (PDB: 7PA3) co-crystal structures.



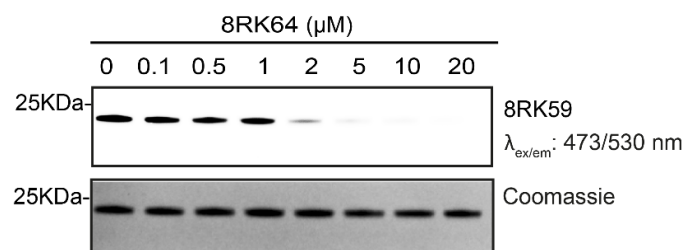

**Figure S2.** Inhibitory activity of **8RK64** towards PARK7. PARK7 (1  $\mu\text{M}$ ) was incubated with increasing concentrations of **8RK64**, followed by incubation with **8RK59** for 30 min. at 37 °C.

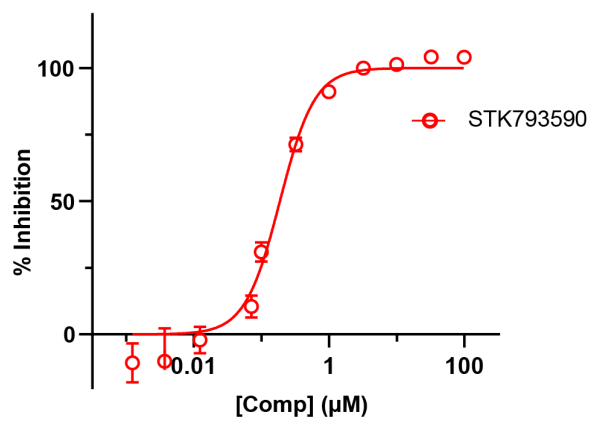

**Figure S3.** IC<sub>50</sub> determination of **STK793590** for PARK7 by DiFMUAc assay.

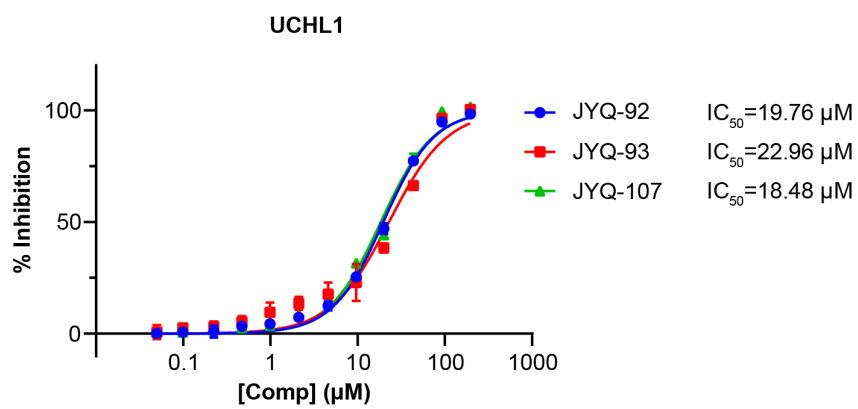

**Figure S4.** IC<sub>50</sub> determination of **JYQ-92**, **JYQ-93**, and **JYQ-107** for UHL1 using Ub-AMC as the substrate.

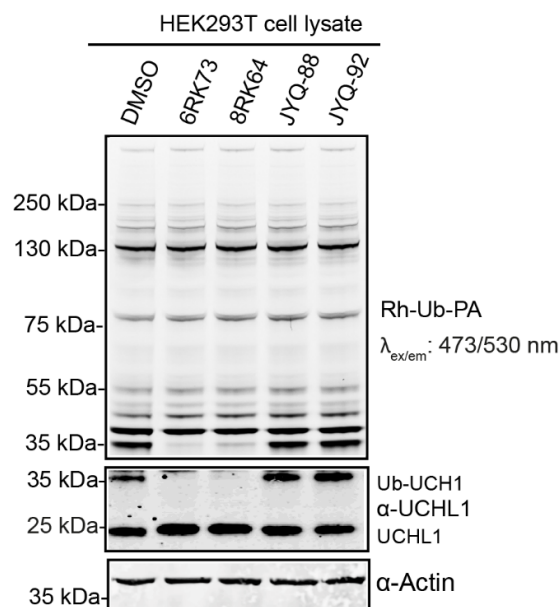

**Figure S5.** Fluorescence labeling of DUBs to investigate their remaining activity by Rh-Ub-PA after the treatment with PARK7 inhibitor **JYQ-88** and probe **JYQ-92**. UCHL1 inhibitors, **6RK73** and **8RK64**, were used as a control. HEK293T cell lysate was treated with 5  $\mu$ M final concentration of the indicated compounds for 1 h at 37  $^{\circ}$ C, followed by incubating with Rho-Ub-PA for 30 min at 37  $^{\circ}$ C. The reactions were stopped by the addition of NuPAGE<sup>TM</sup> LDS sample buffer (4X). Samples were resolved by SDS-PAGE using a 4-12% Bis-Tris gel with MOPS SDS running buffer (Novex, NuPAGE) and visualized by fluorescence scanning on a Typhoon FLA 9500 (GE Healthcare Life Sciences) using a Rhodamine channel ( $\lambda_{\text{ex/em}}$  473/530 nm), followed by transferring to Nitrocellulose membranes and Western blot analysis.

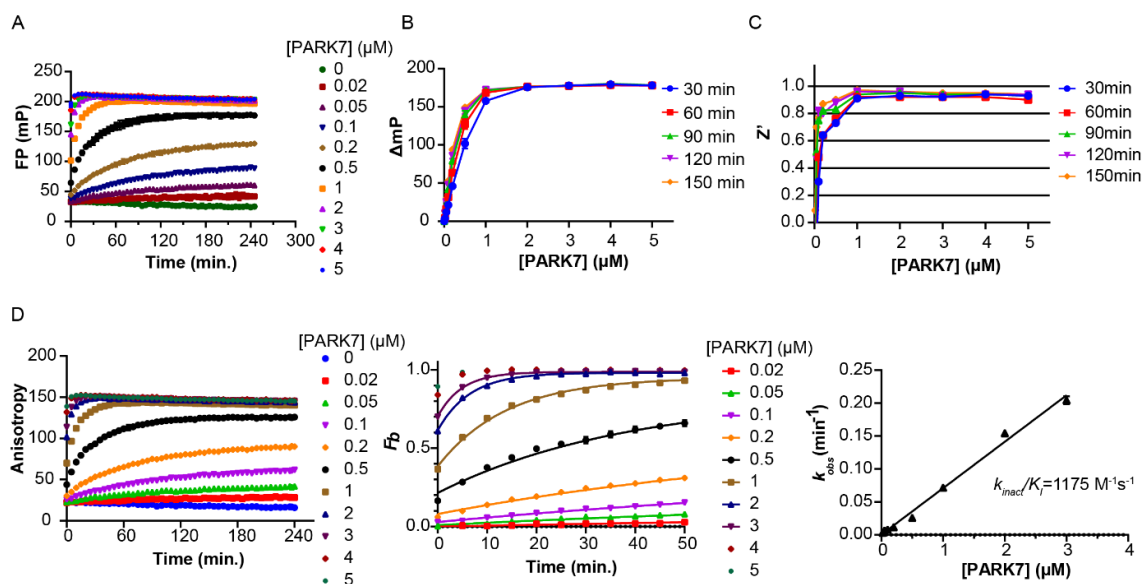

**Figure S6.** The development of the FP assay. (A) Relation between FP value and incubation times at different concentrations of PARK7. (B) Relation between the change in FP value and PARK7 concentration at different incubation times. (C) The corresponding  $Z'$  value. Panel B and C are full graphs of the graphs in Figure 5B in the main paper. (D) Determination of  $k_{inact}/K_I$  value for FP probe **JYQ-107**. Left panel: Relation between anisotropy and incubation times at different concentrations of PARK7. Middle panel: The probe bound fraction ( $F_b$ ) was calculated for each datapoint by normalization of the anisotropy data to fully unbound (no PARK7) and fully bound (plateau) states followed by baseline correction. The pseudo-first order rate constant  $k_{obs}$  for each PARK7 concentration was determined by fitting the  $F_b$  data to the pseudo-first order association equation  $Y=Y_0 + (\text{Plateau}-Y_0)*(1-\exp(-k_{obs}*t))$ , where  $Y=F_b$ . The data for the highest concentrations of PARK7 (4 and 5  $\mu\text{M}$ ) could not be fitted because the reaction was too fast. Right panel:  $k_{obs}$  values were plotted against PARK7 concentration and the  $k_{inact}/K_I$  value was calculated from the slope of a linear fit of the data.

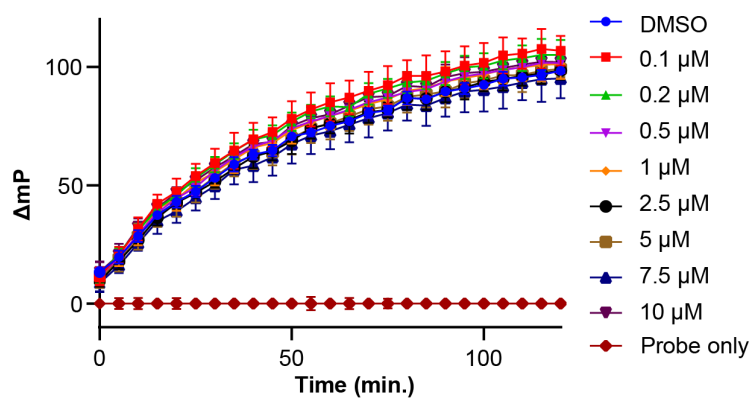

**Figure S7.** Change in FP value over time at different concentrations of inhibitor **JYQ-55**. PARK7 was incubated with increasing concentrations of inactive compound **JYQ-55** for 60 min. followed by the addition of FP probe **JYQ-107** and the change in FP was monitored over time.

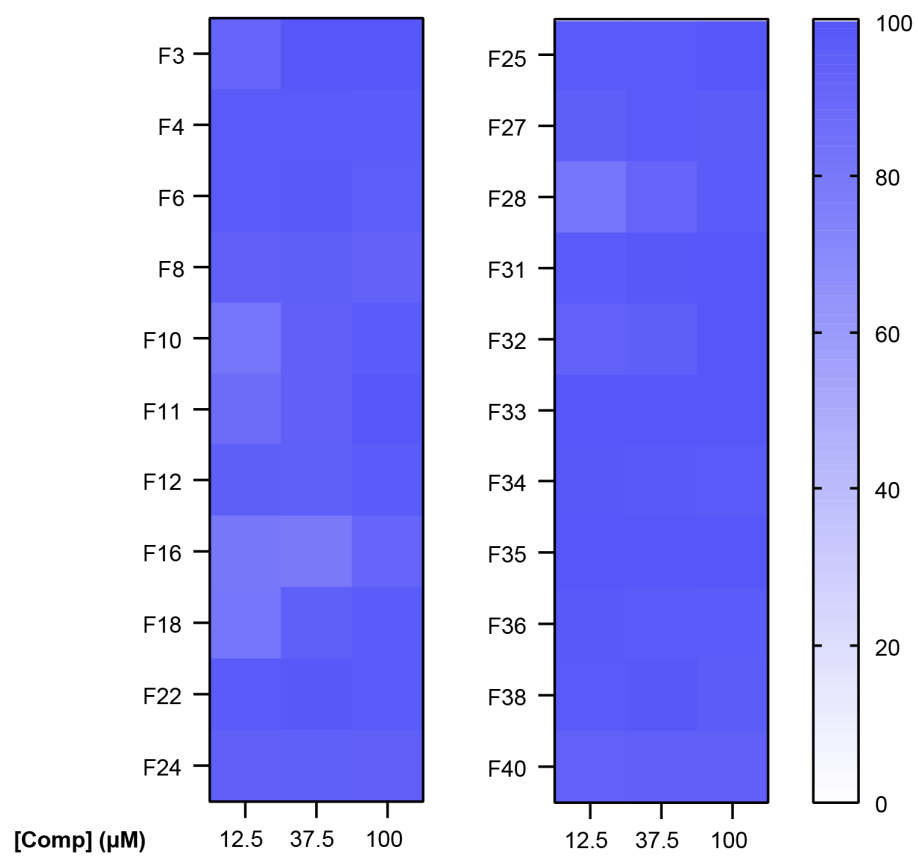

**Figure S8.** Heatmap displaying the validation of hits using the DiFMUAc assay. (White: 0% inhibition, blue: 100% inhibition.)

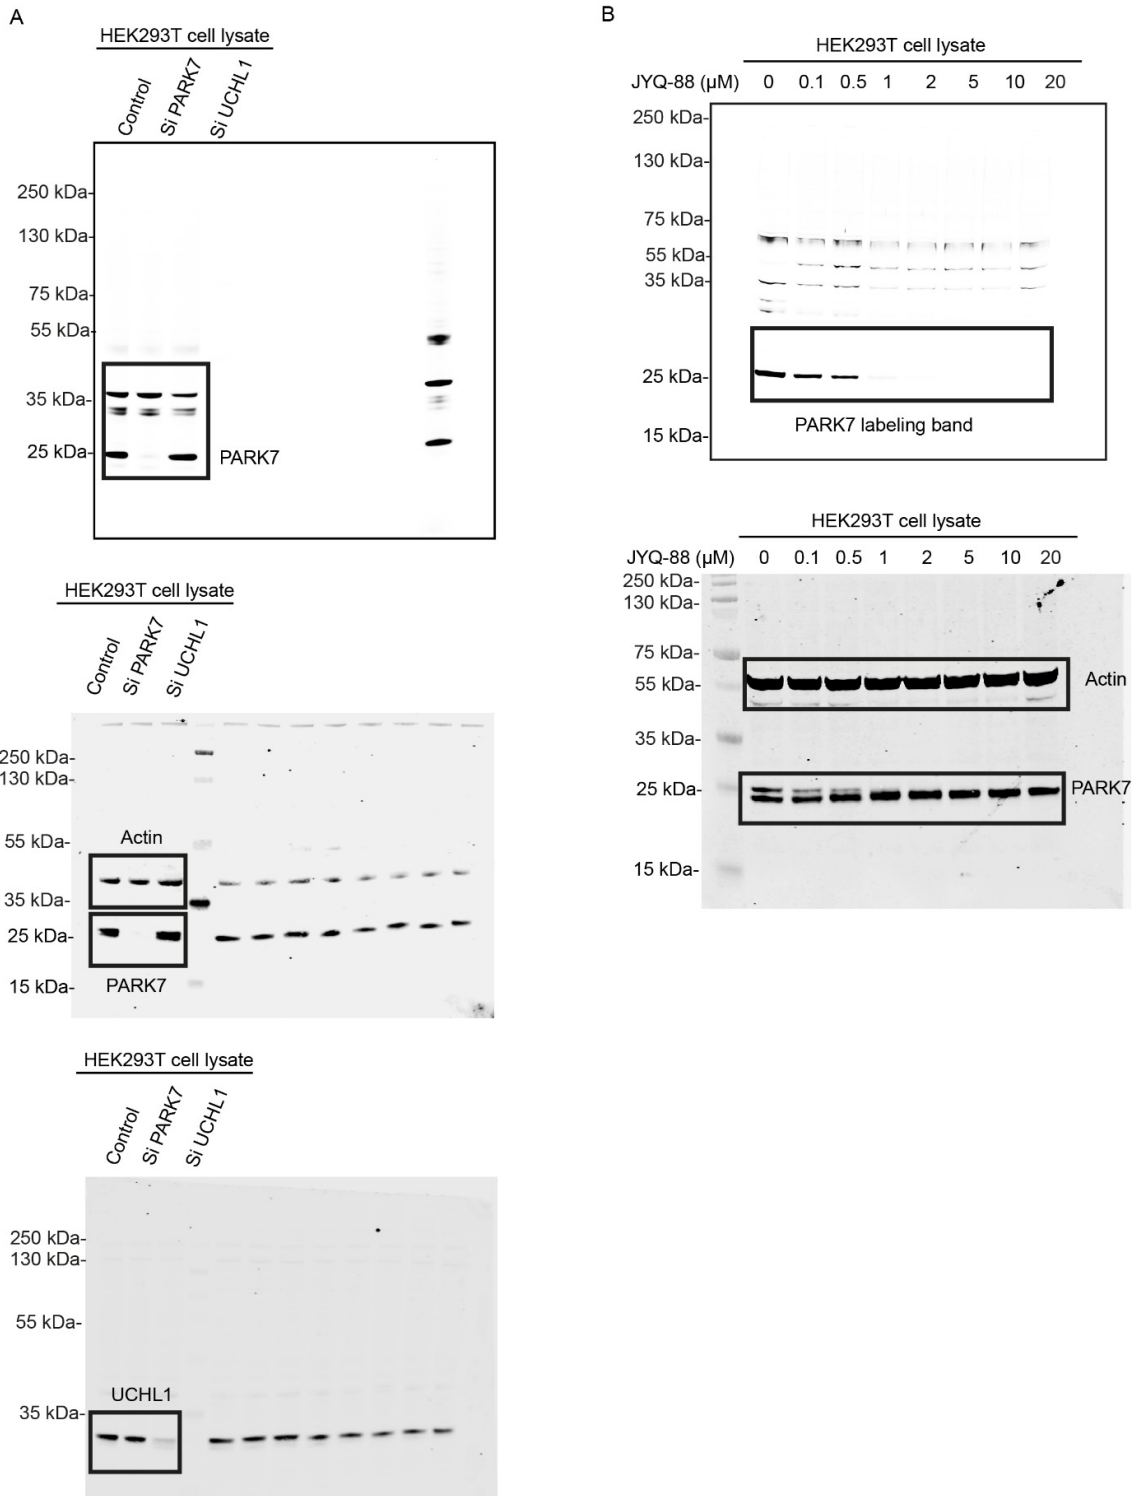

**Figure S9.** Uncropped and unprocessed gel images in Figure 4. (A) Related to Figure 4D: In-gel fluorescence scanning of PARK7 activity by JYQ-92 in HEK293T cell lysate with/without depletion of PARK7 or UCHL1 (top panel) and immunoblot of PARK7 with actin as a loading control (middle panel), together with immunoblot of UCHL1 (bottom panel). (B) Related to



Figure 4E: In-gel fluorescence scanning of PARK7 activity by JYQ-92 in HEK293T cell lysate after treatment with inhibitor **JYQ-88** (top panel) and immunoblot of PARK7 with actin as a loading control (bottom panel).

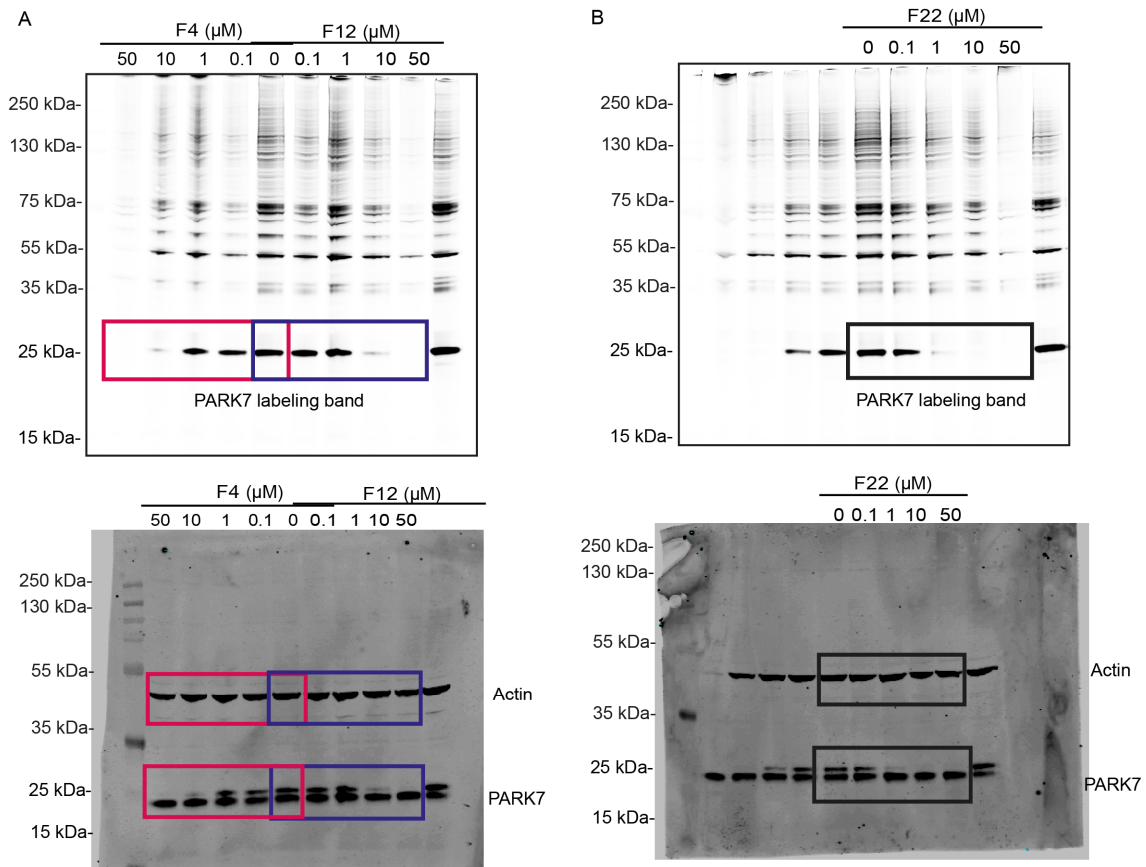

**Figure S10.** Uncropped and unprocessed gel images in Figure 6E. (A) In-gel fluorescence scanning of PARK7 activity by **JYQ-92** in HEK293T cell lysate after treatment with fragment F4 (left from the top panel) and F12 (right from the top panel), and immunoblot of PARK7 with actin as a loading control (bottom panel). (B) In-gel fluorescence scanning of PARK7 activity in HEK293T cell lysate by **JYQ-92** after treatment with fragment F22 (top panel) and immunoblot of PARK7 with actin as a loading control (bottom panel).

### Synthesis of STK793590

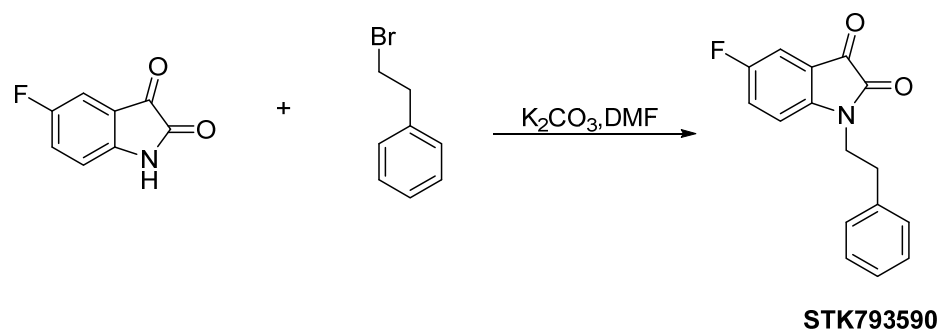

### Synthesis of DiFMUAc assay reagent

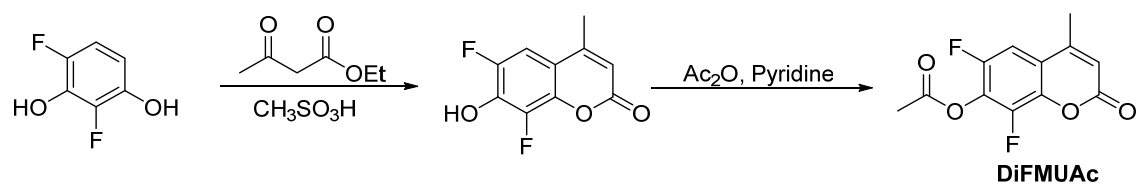

## NMR spectra

$^1\text{H-NMR}$  and  $^{13}\text{C-NMR}$  of compound **2b** in  $\text{CDCl}_3$ .

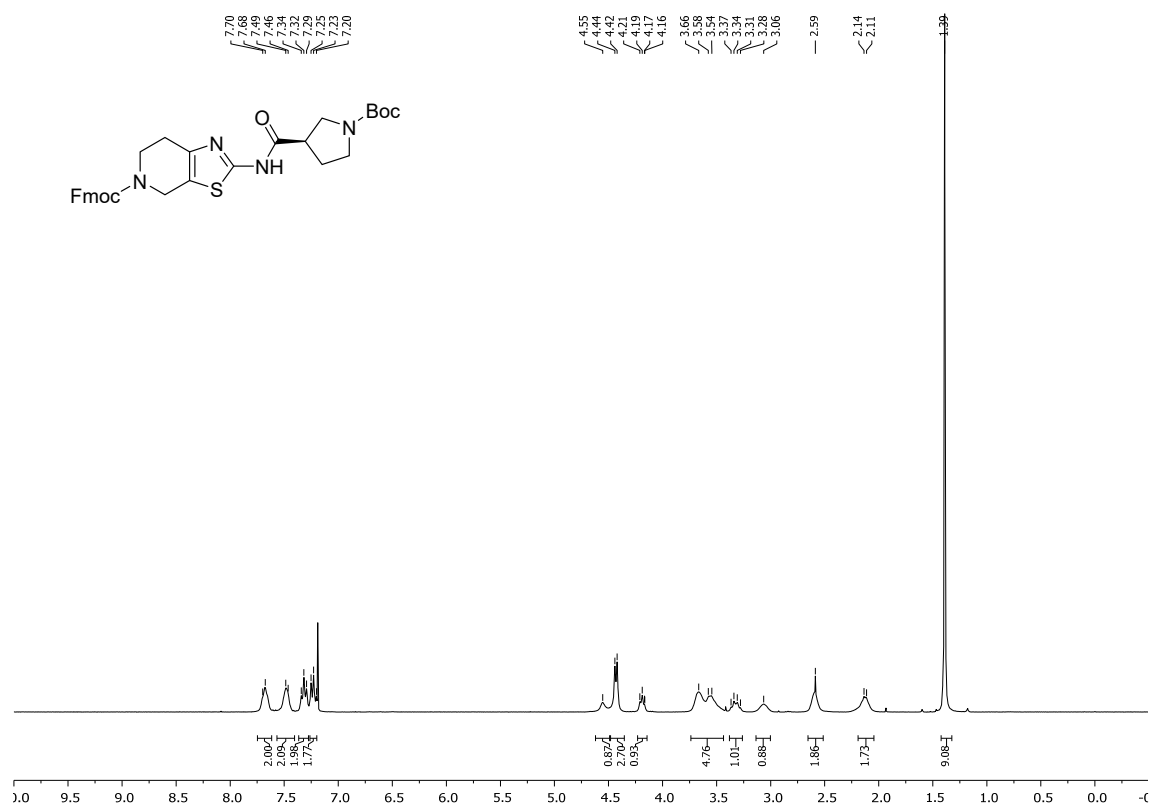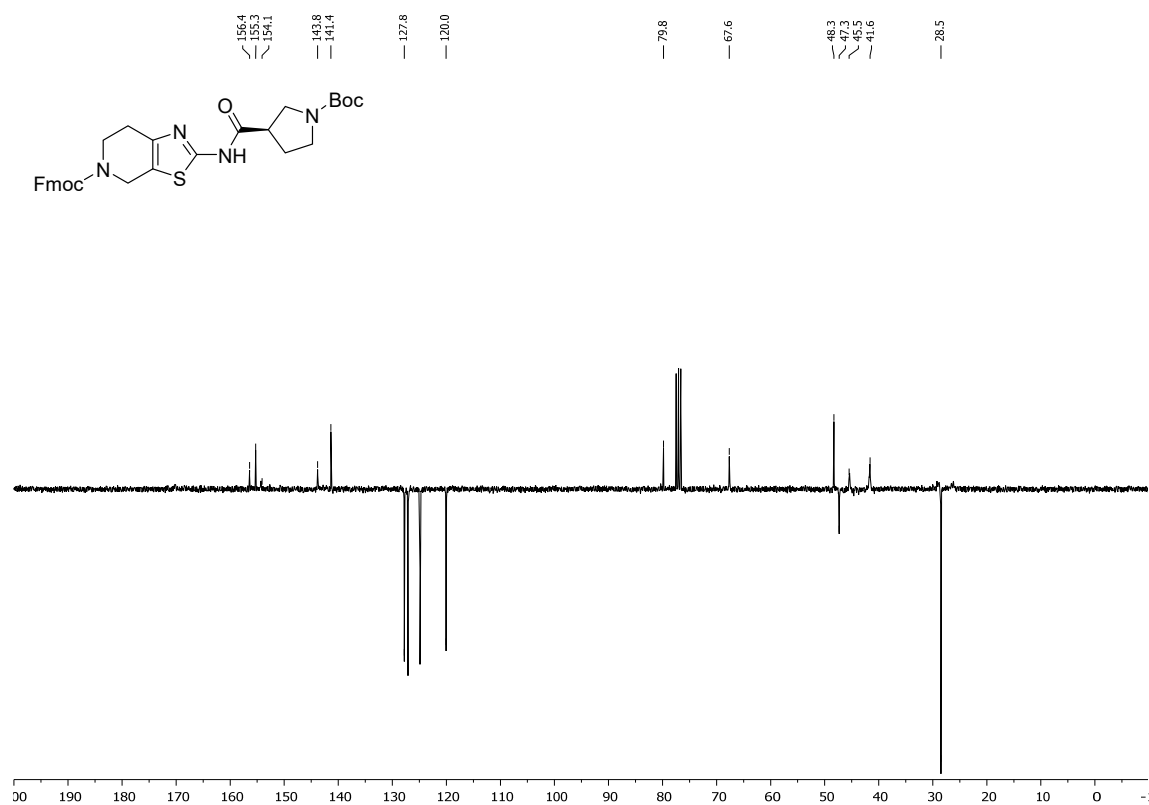

**<sup>1</sup>H-NMR and <sup>13</sup>C-NMR of compound 3a in CDCl<sub>3</sub>.**

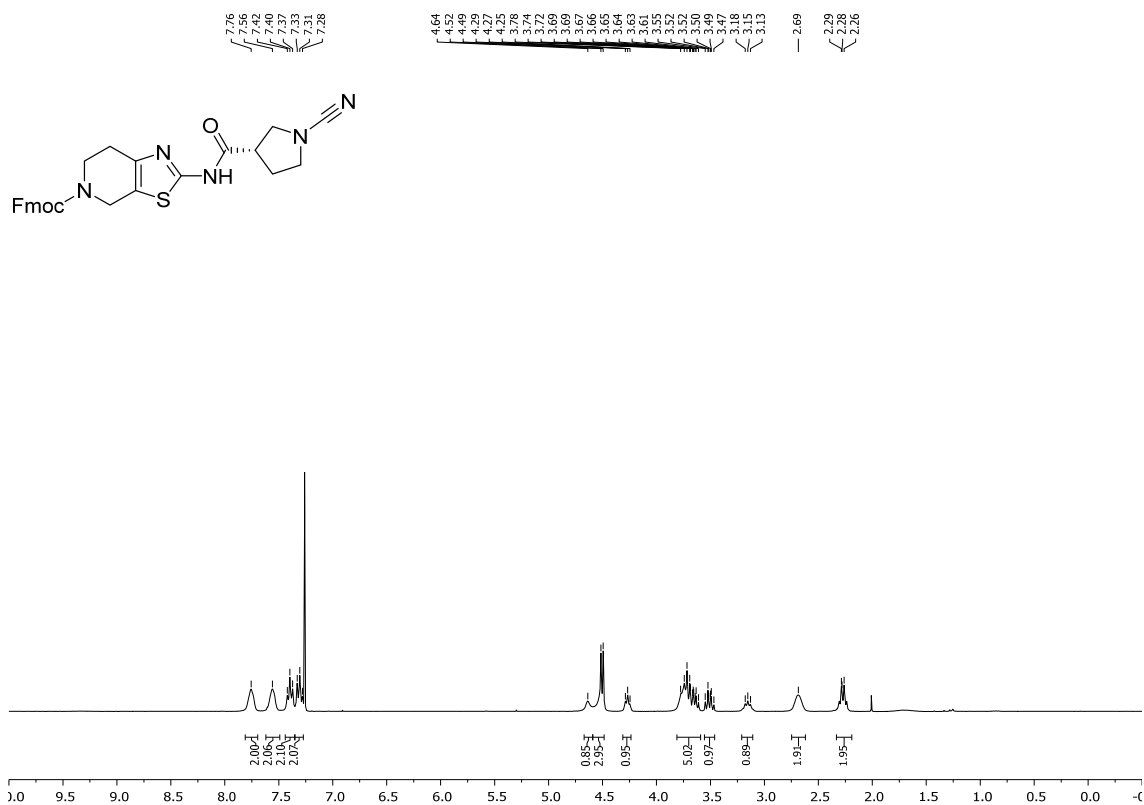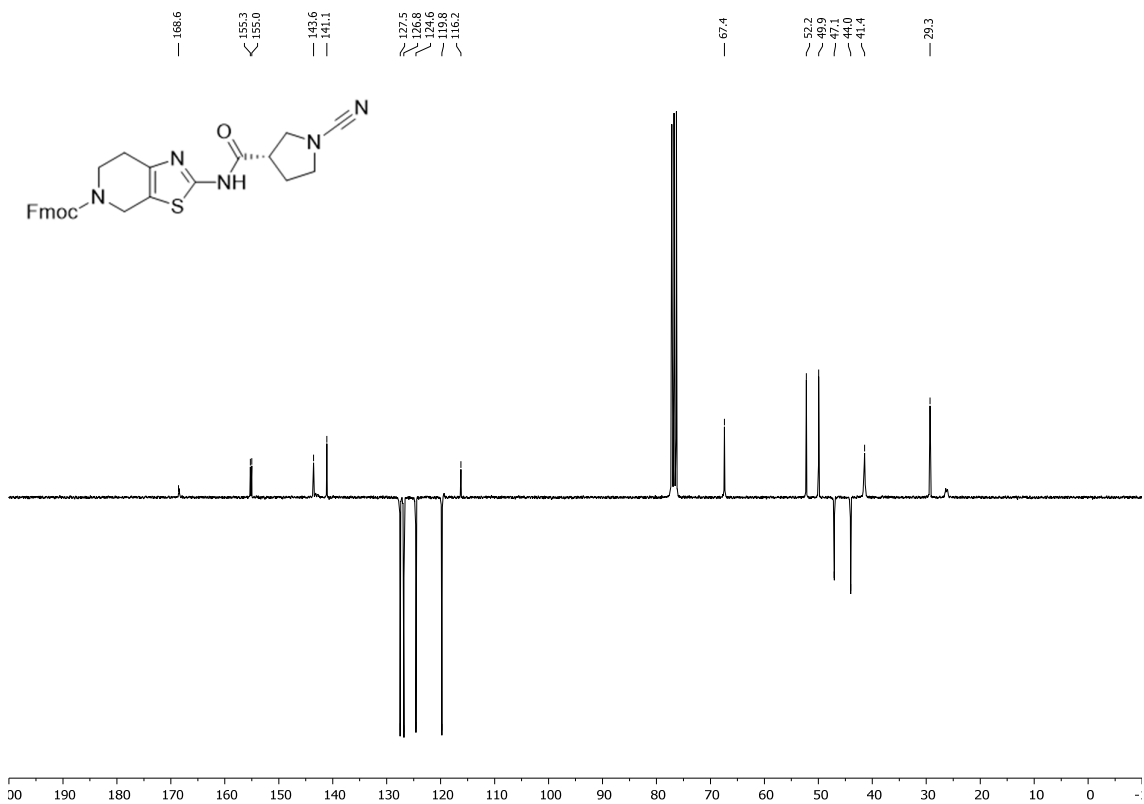

**$^1\text{H-NMR}$  and  $^{13}\text{C-NMR}$  of compound 3b in  $\text{CDCl}_3$ .**

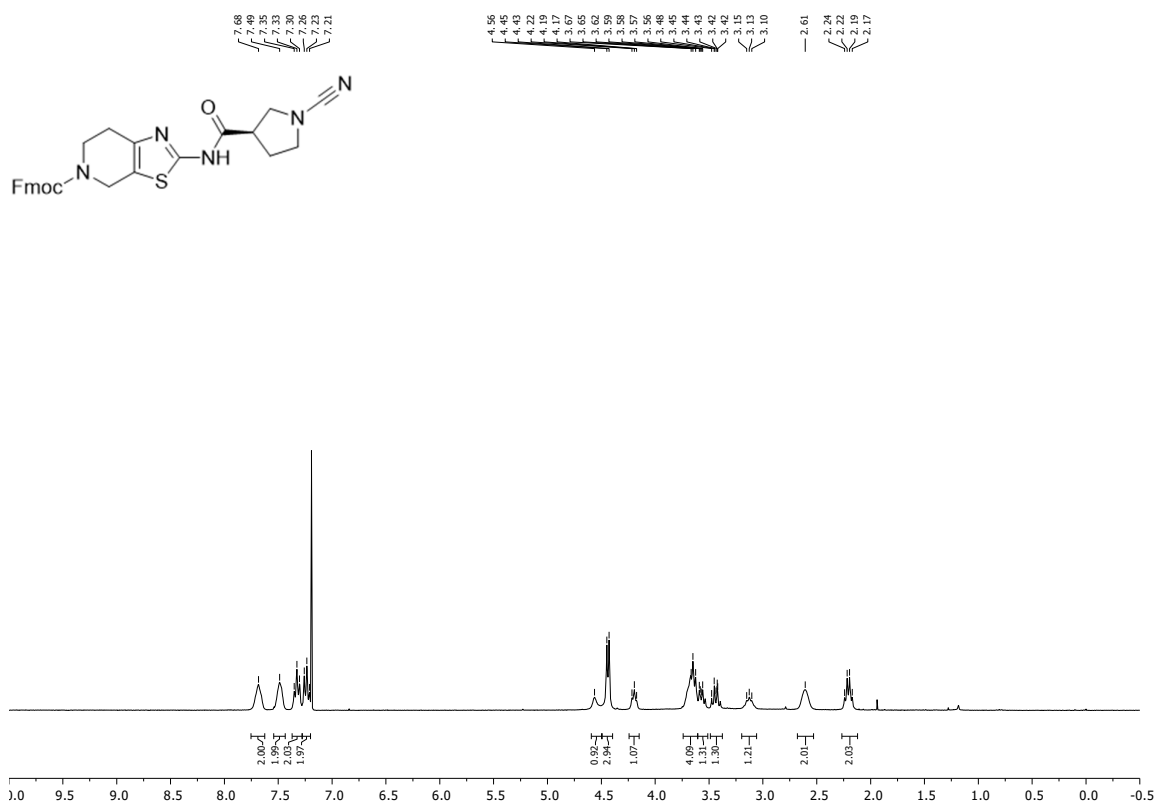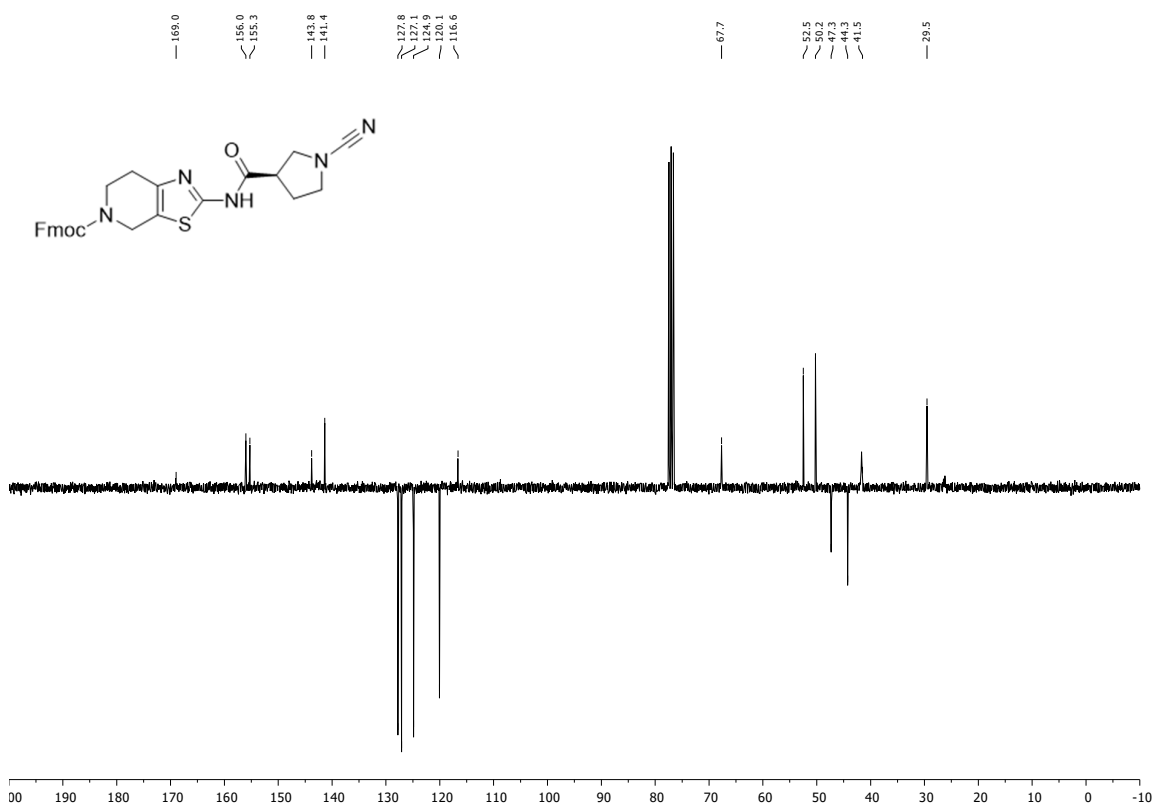

**<sup>1</sup>H-NMR and <sup>13</sup>C-NMR of compound JYQ-55 in DMSO.**

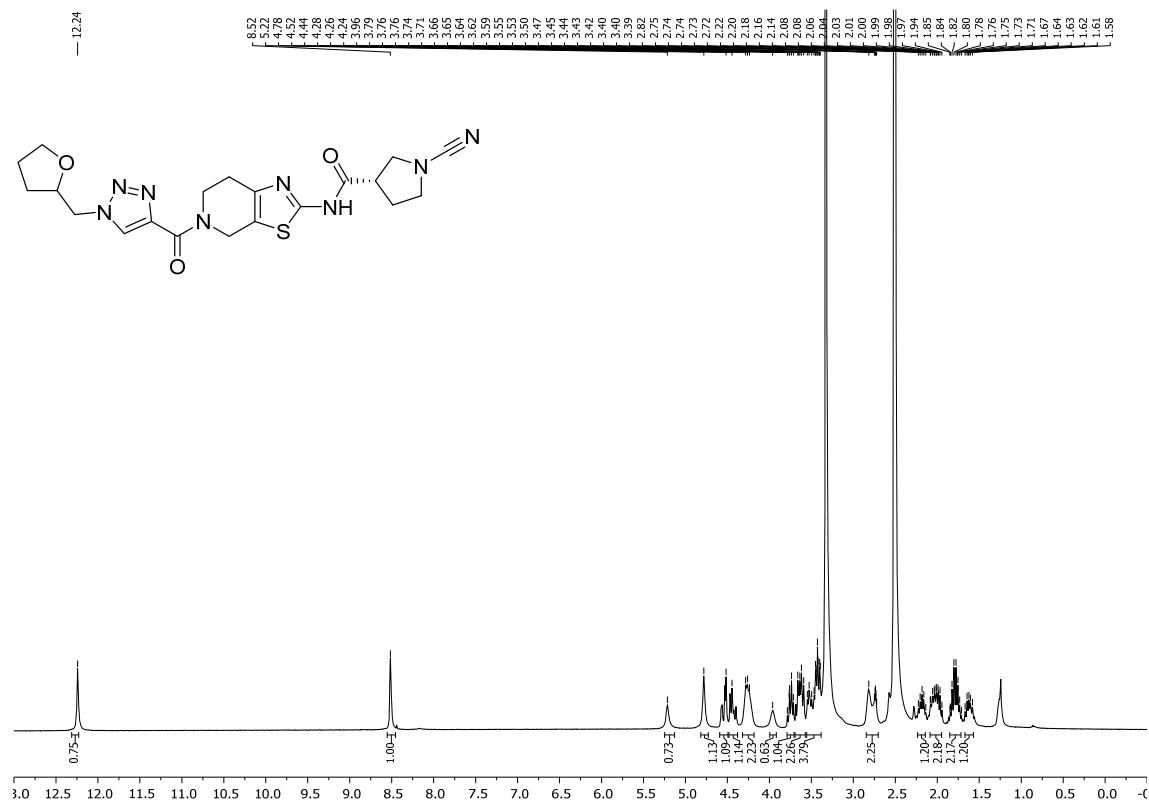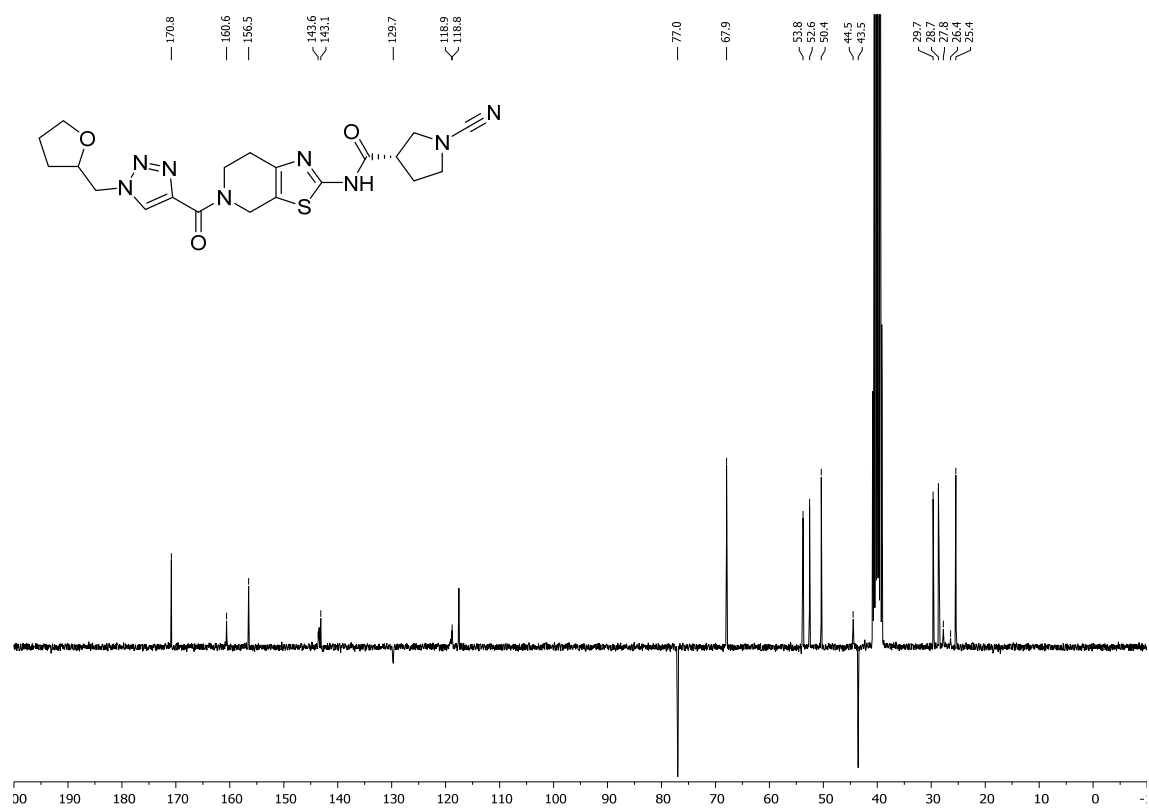

**<sup>1</sup>H-NMR and <sup>13</sup>C-NMR of compound JYQ-76 in DMSO.**

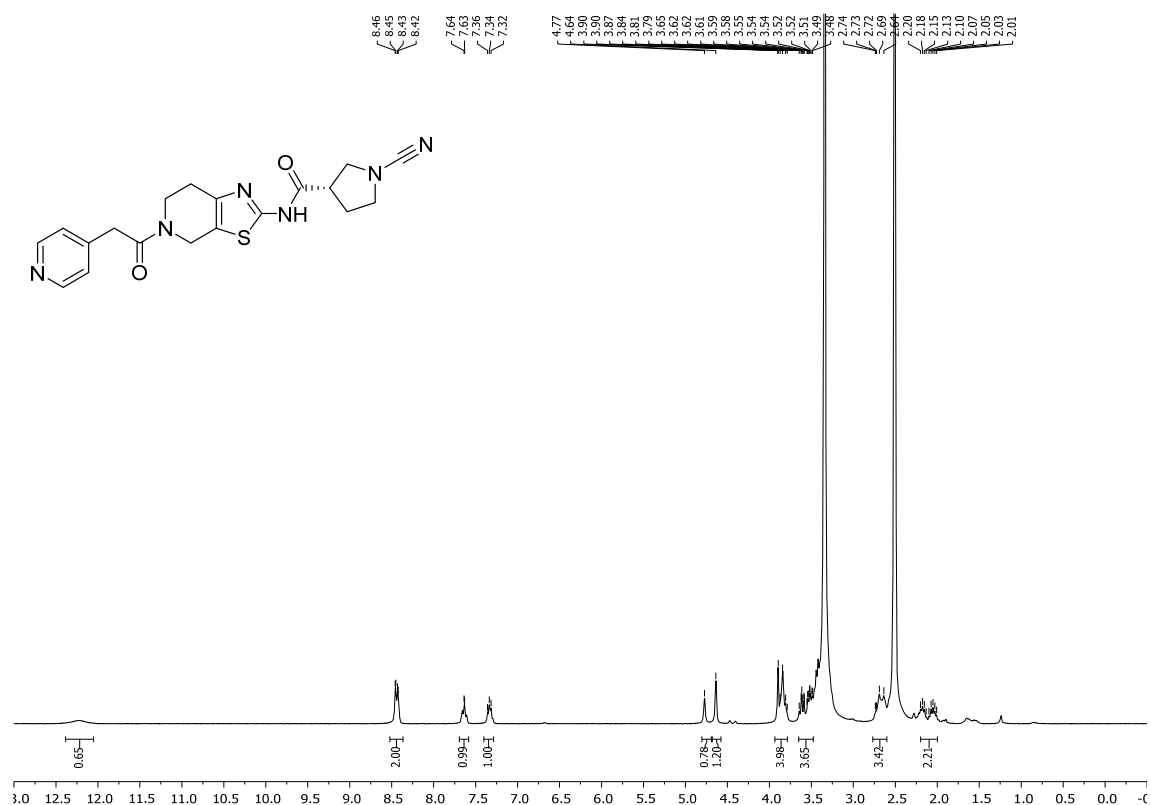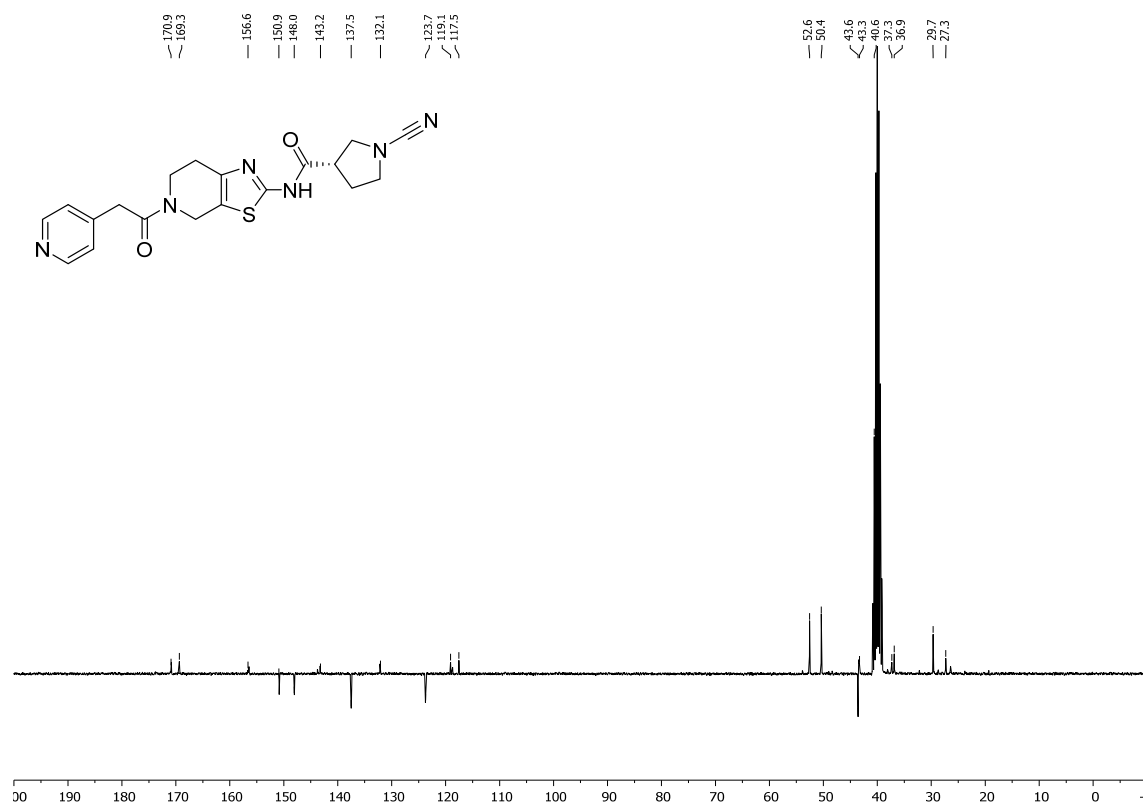



# <sup>1</sup>H-NMR and <sup>13</sup>C-NMR of compound JYQ-77 in DMSO.

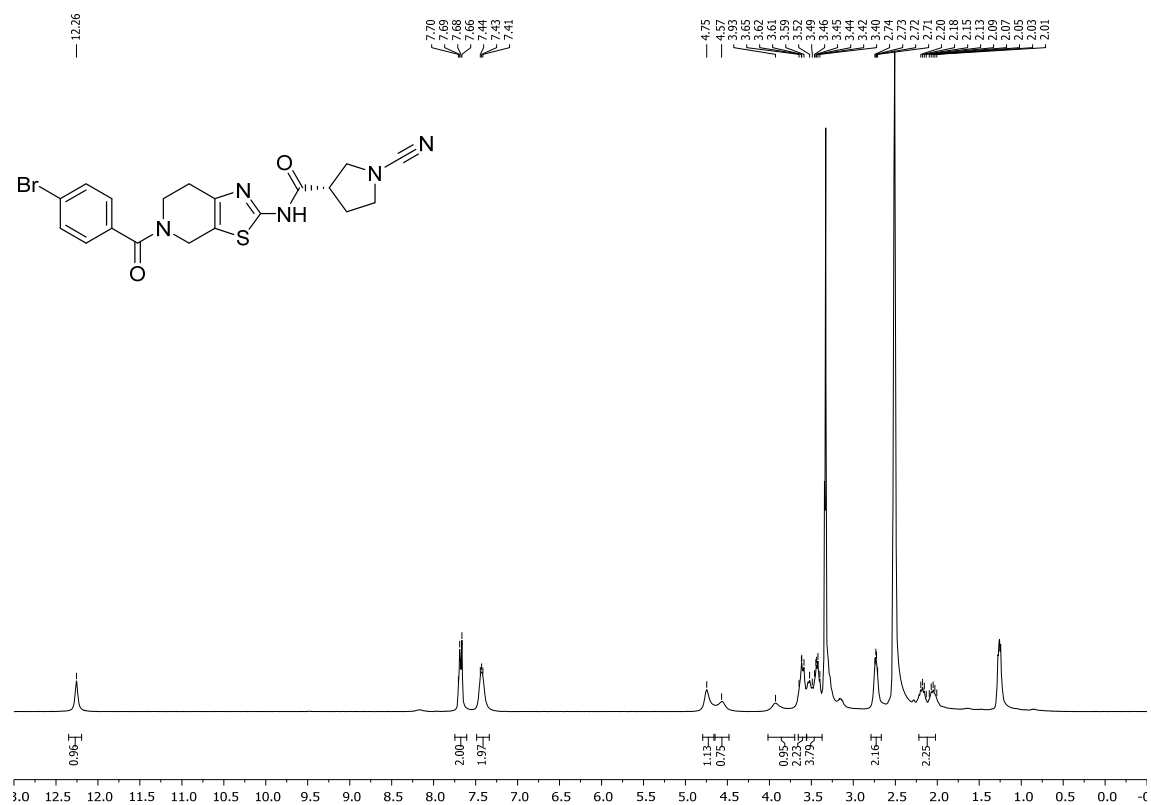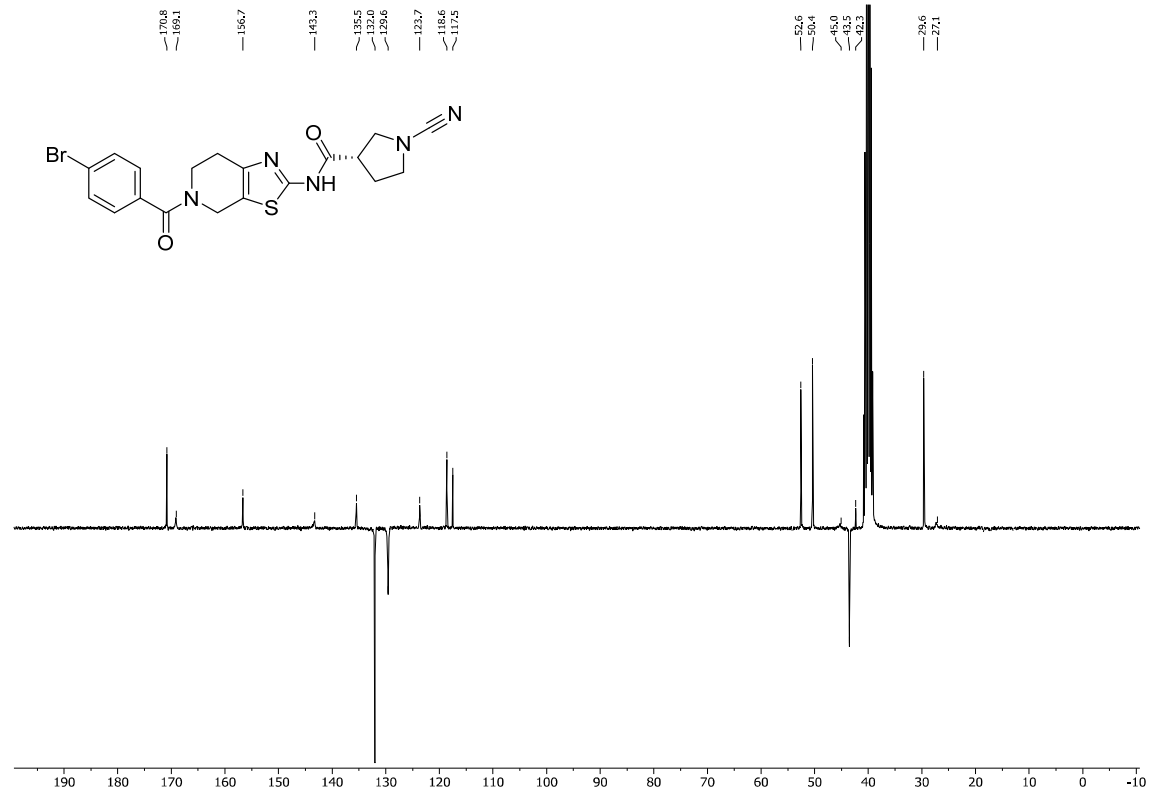

# <sup>1</sup>H-NMR and <sup>13</sup>C-NMR of compound JYQ-78 in DMSO.

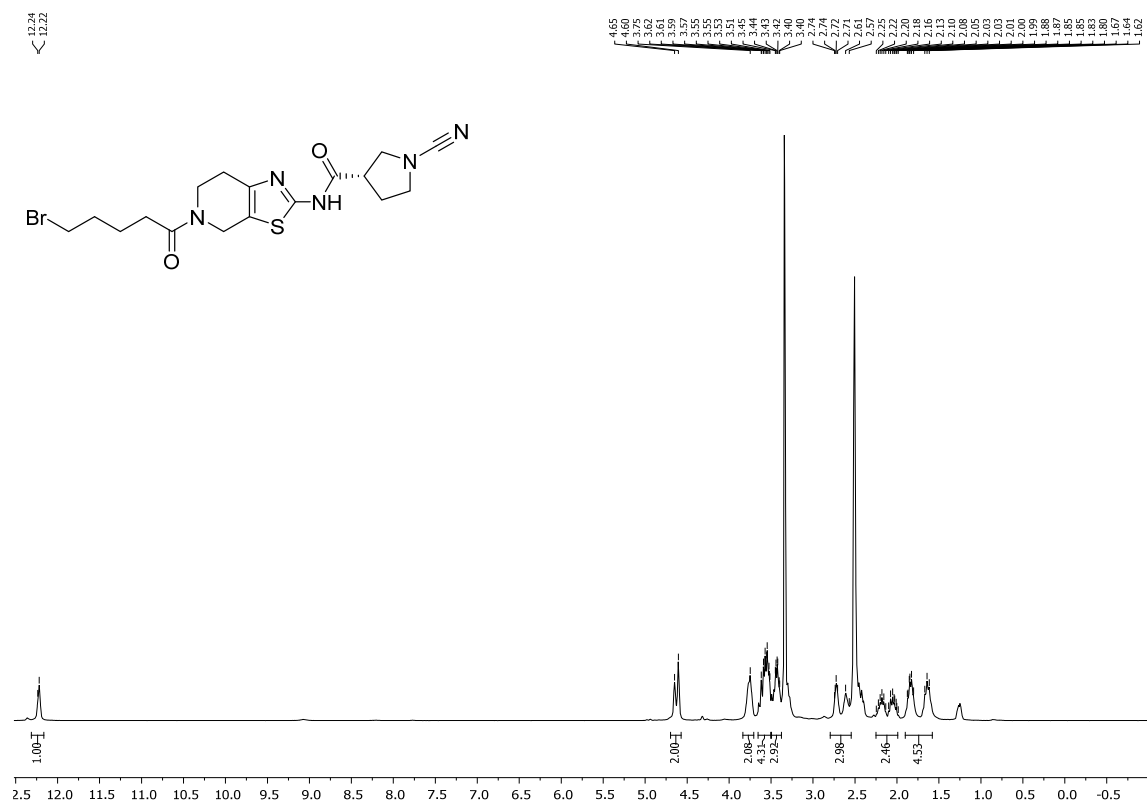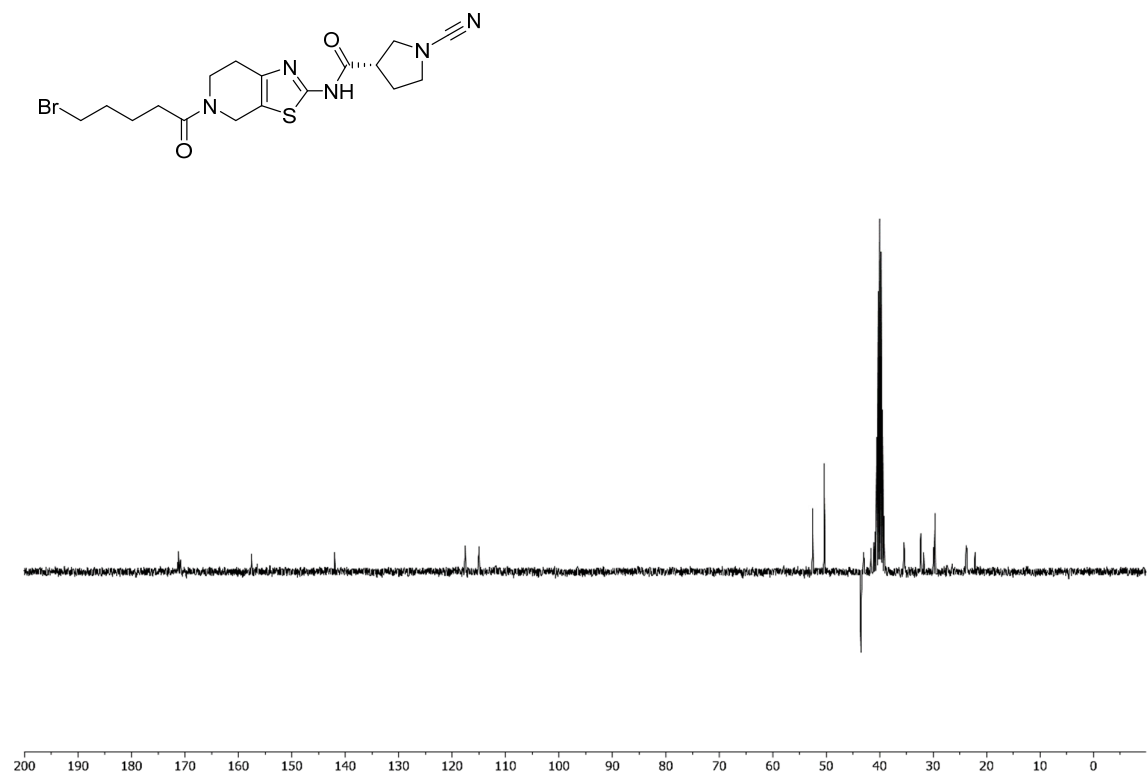

**<sup>1</sup>H-NMR and <sup>13</sup>C-NMR of compound JYQ-79 in DMSO.**

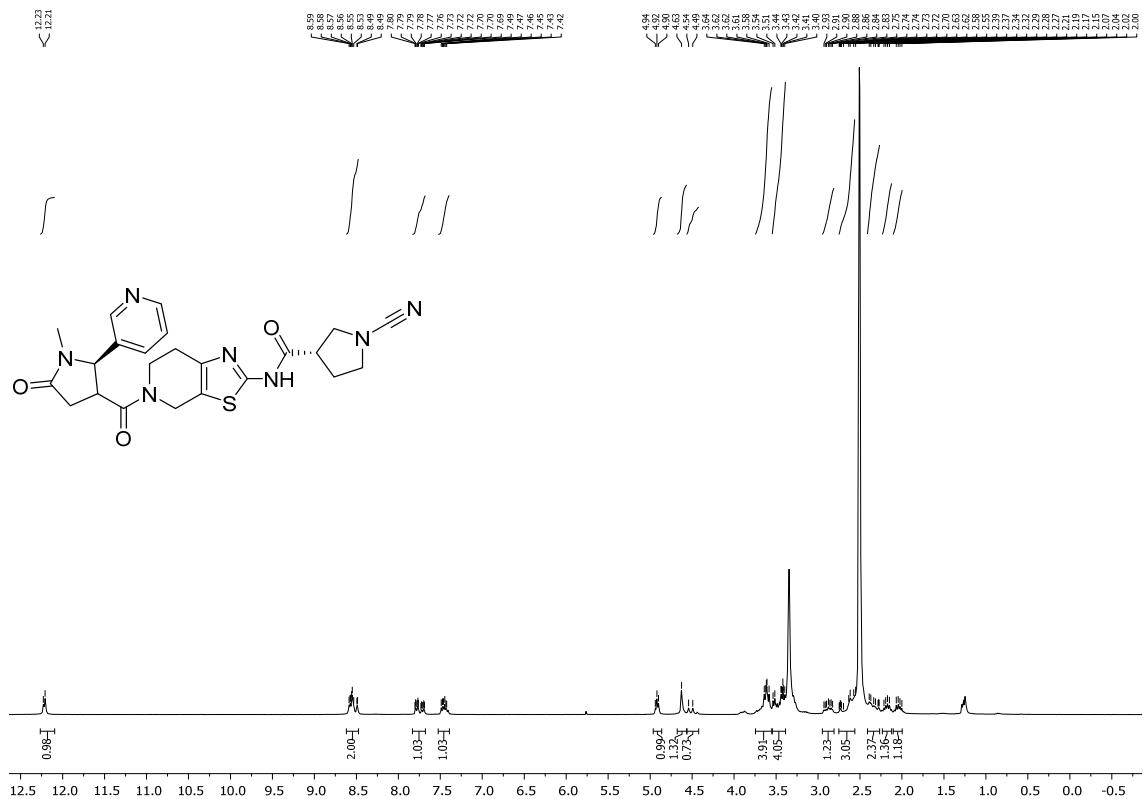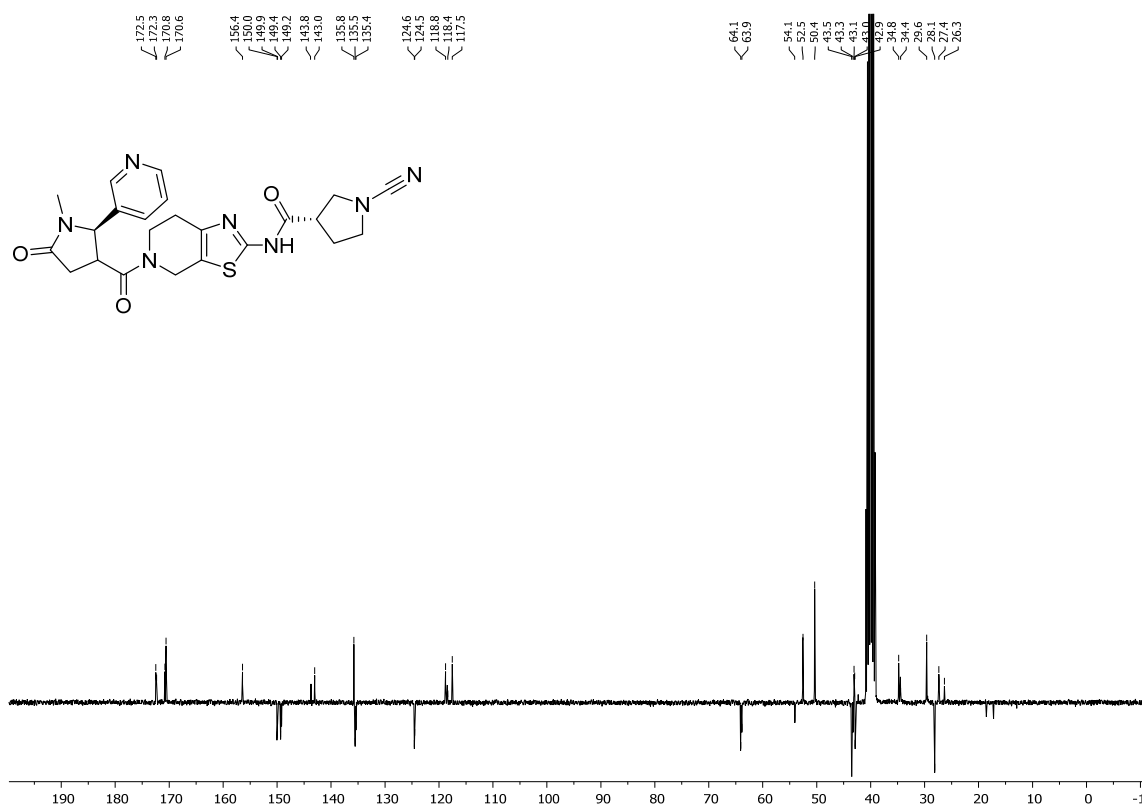

**$^1\text{H-NMR}$  and  $^{13}\text{C-NMR}$  of compound JYQ-83 in DMSO.**

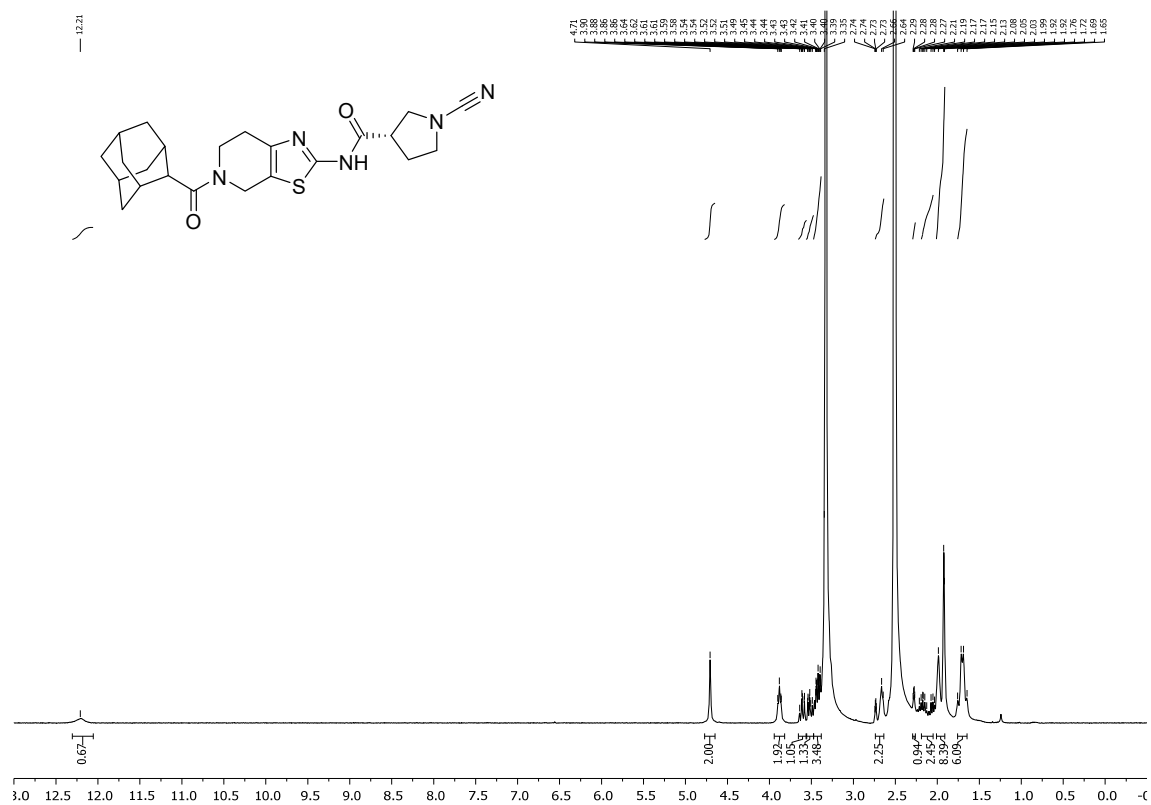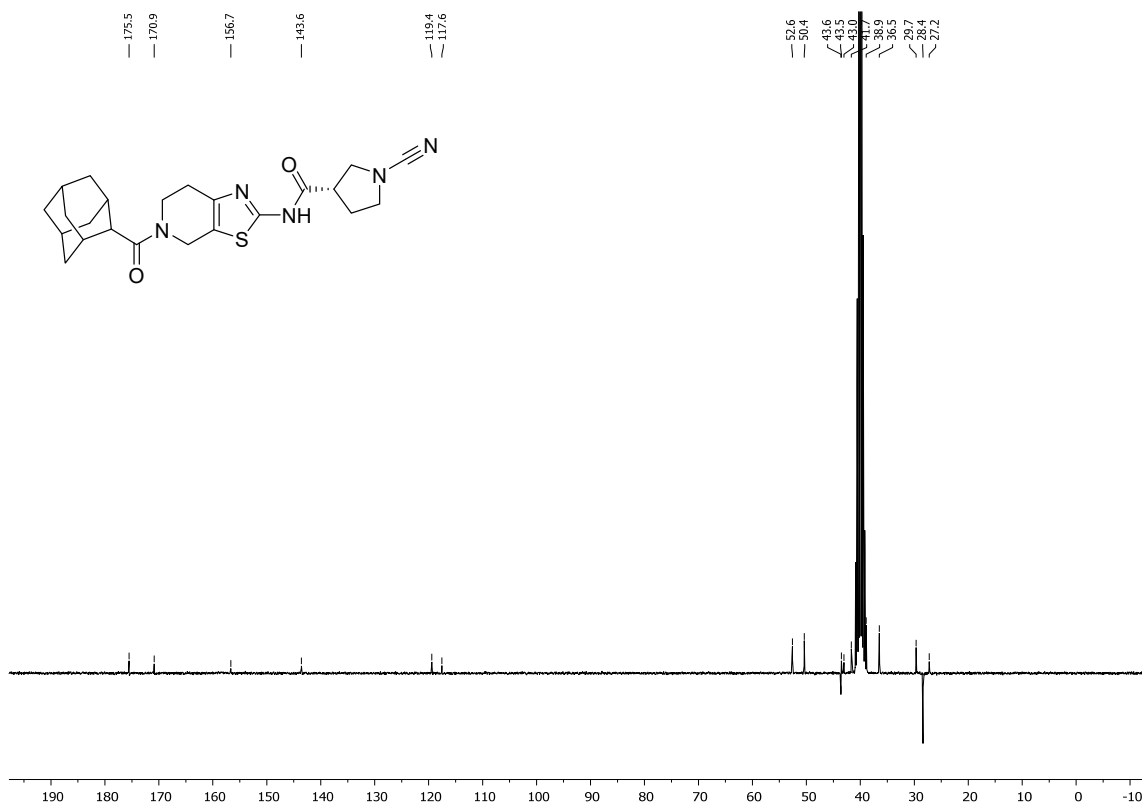

**$^1\text{H-NMR}$  and  $^{13}\text{C-NMR}$  of compound JYQ-88 in  $\text{CDCl}_3$ .**

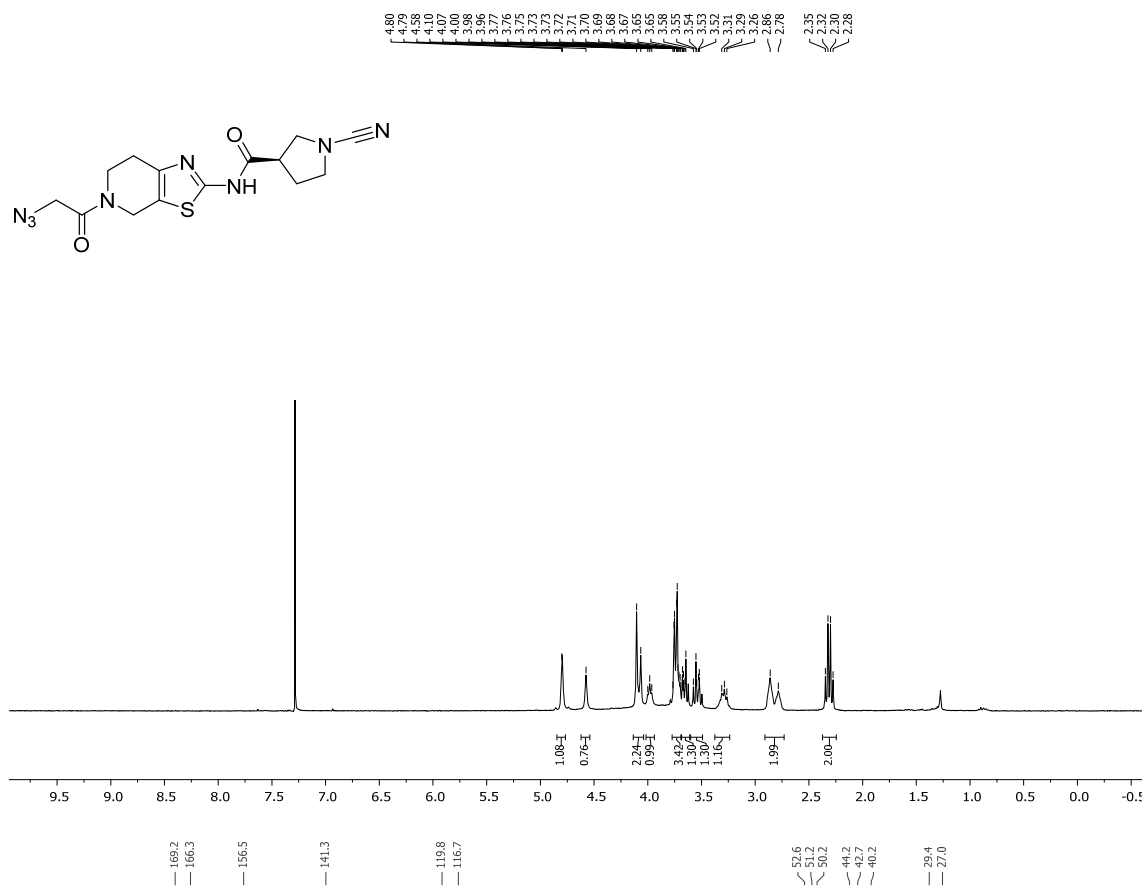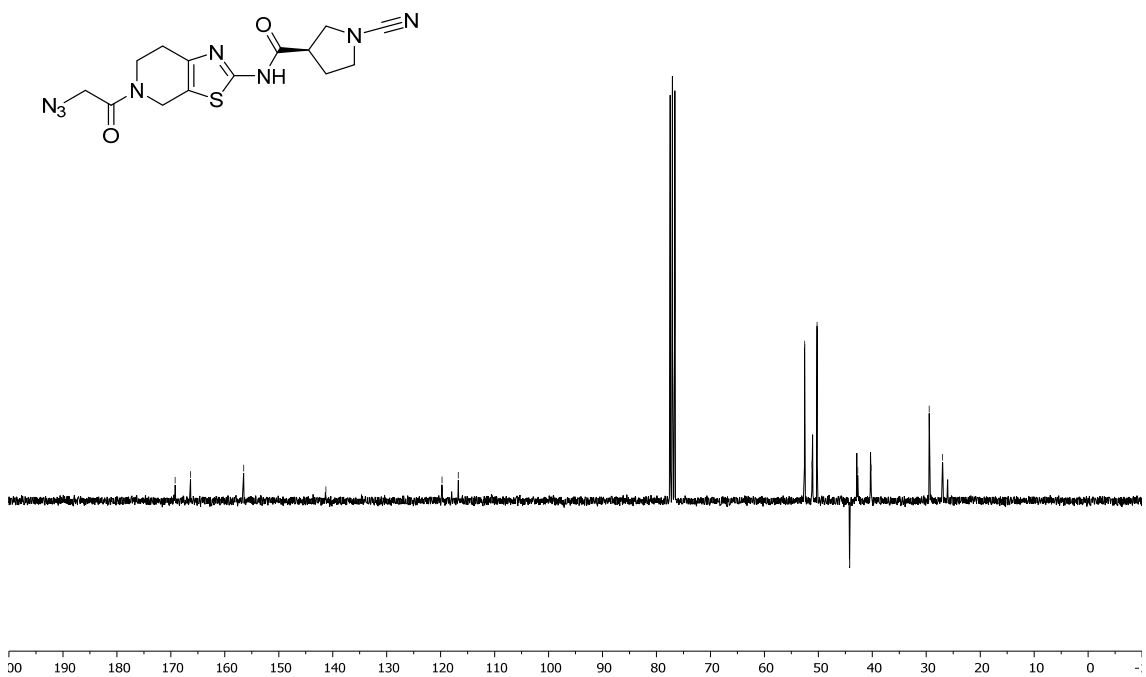

# <sup>1</sup>H-NMR and <sup>13</sup>C-NMR of compound JYQ-92 in DMSO.

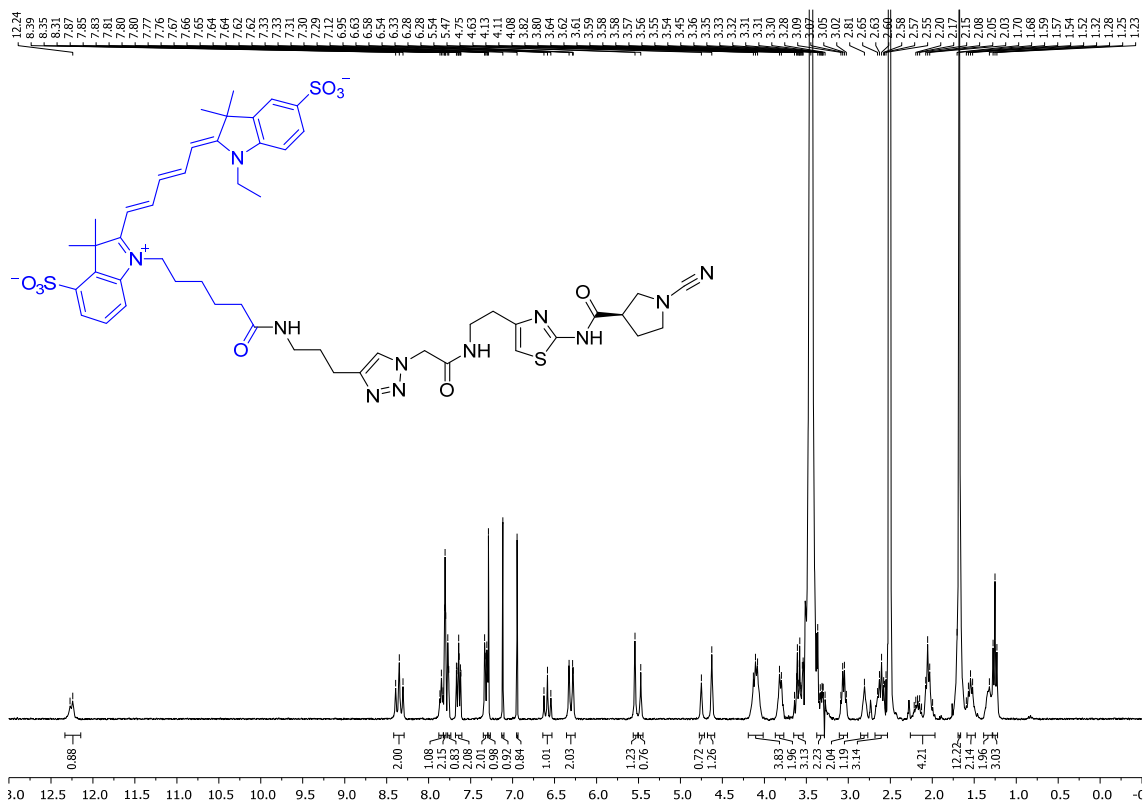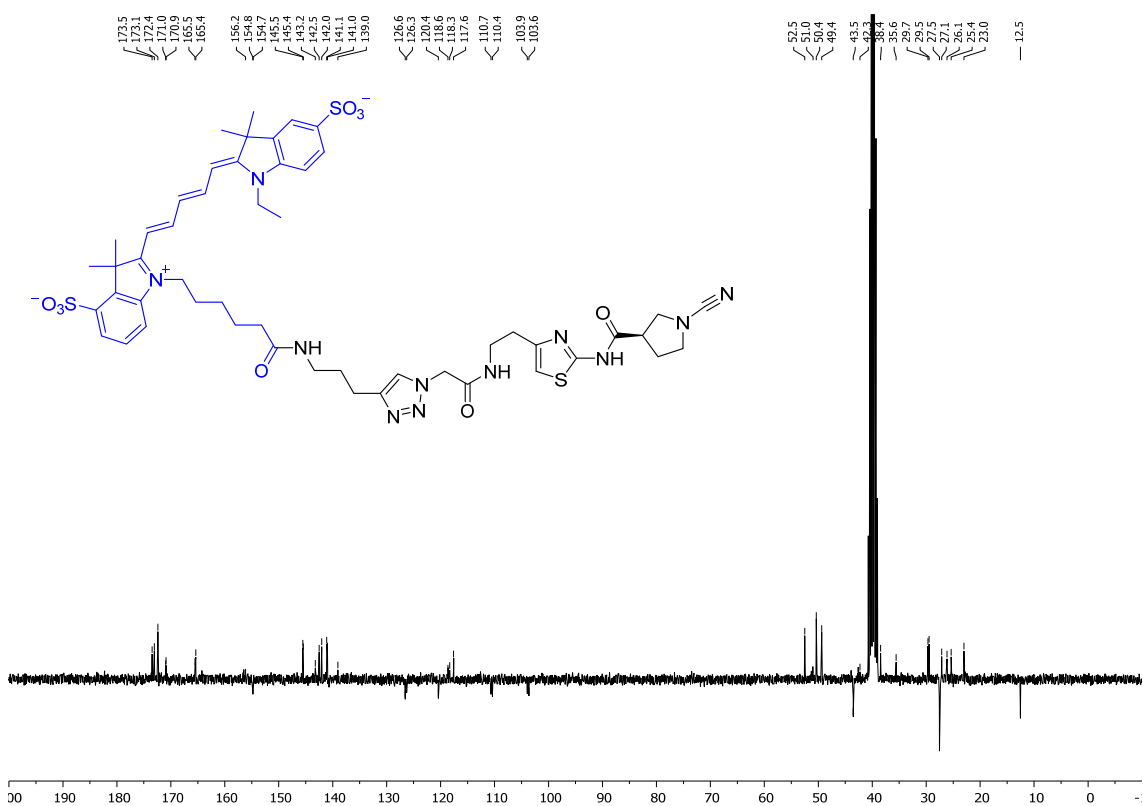

**$^1\text{H-NMR}$  and  $^{13}\text{C-NMR}$  of compound JYQ-93 in DMSO.**

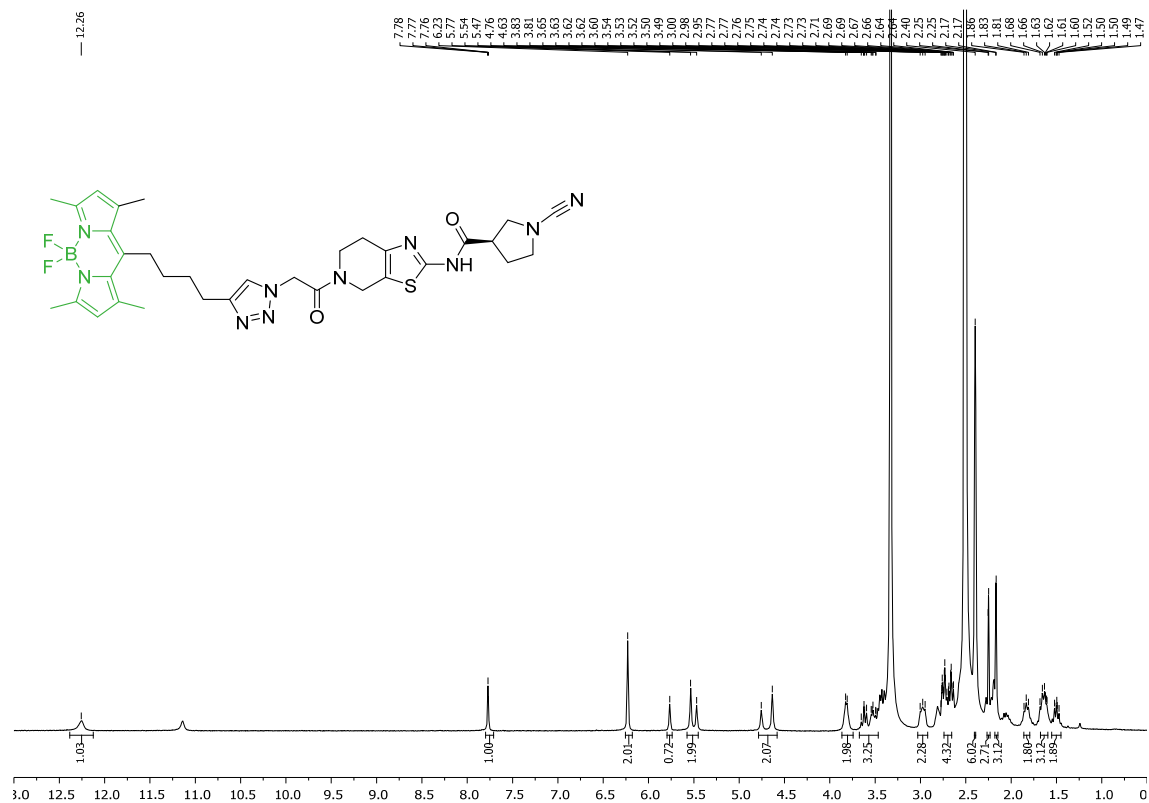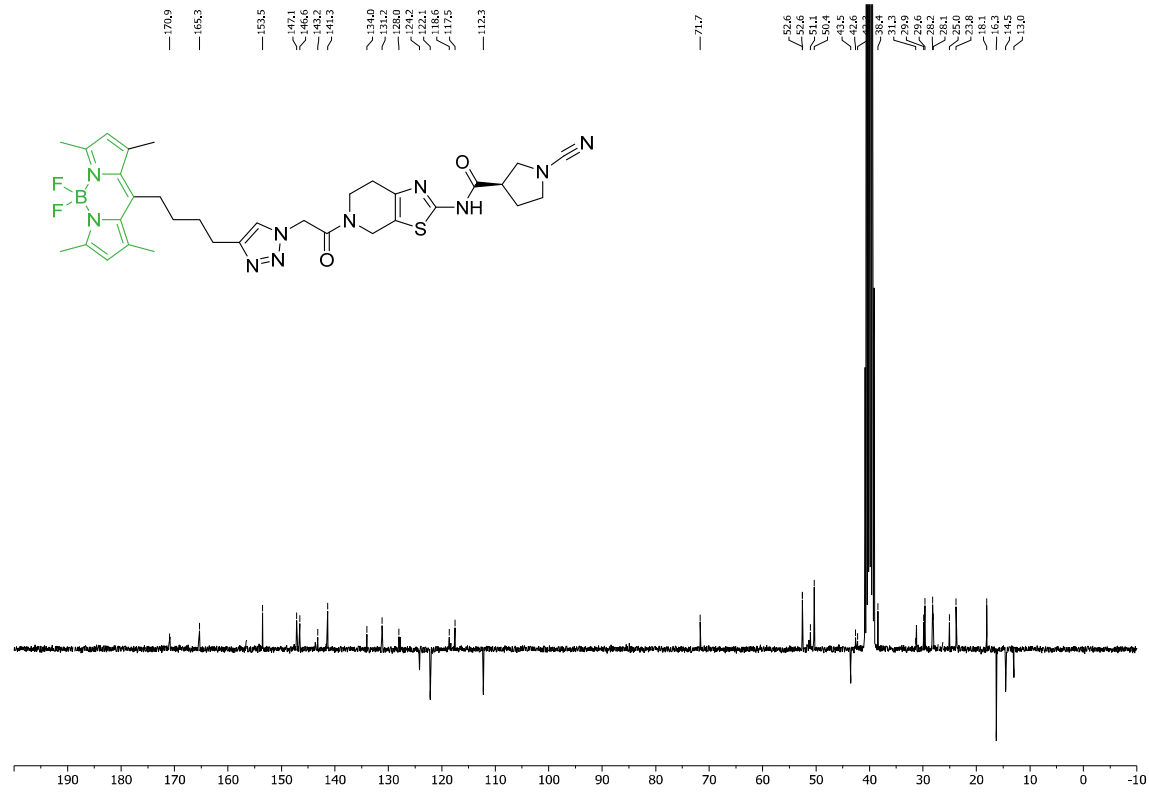





**<sup>1</sup>H-NMR and <sup>13</sup>C-NMR of compound STK793590 in DMSO.**

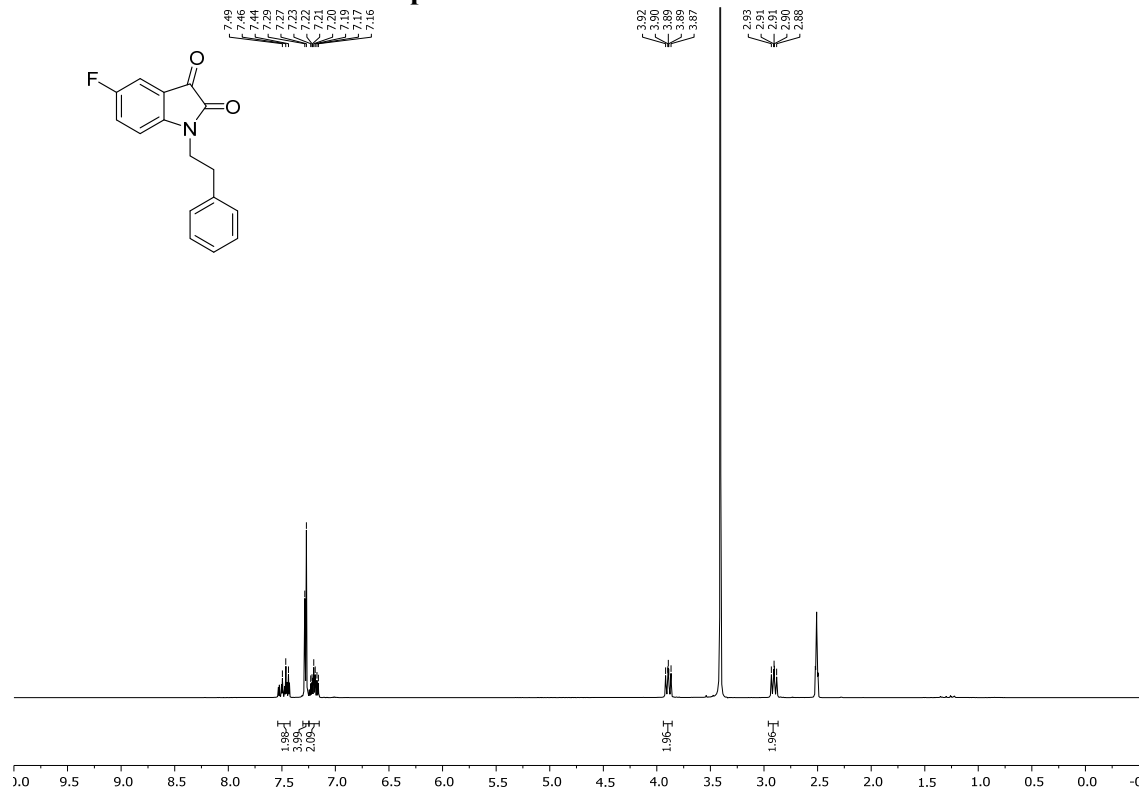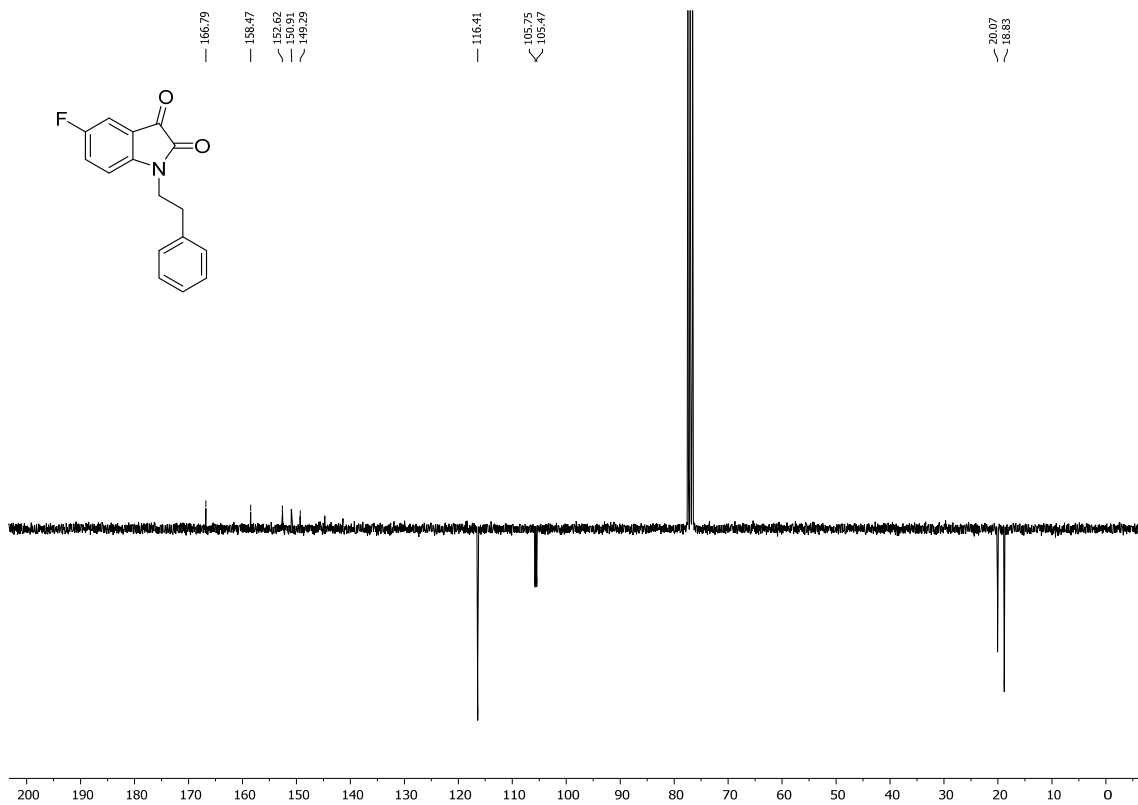

# $^1\text{H-NMR}$ and $^{13}\text{C-NMR}$ of compound DiFMuAc in DMSO.

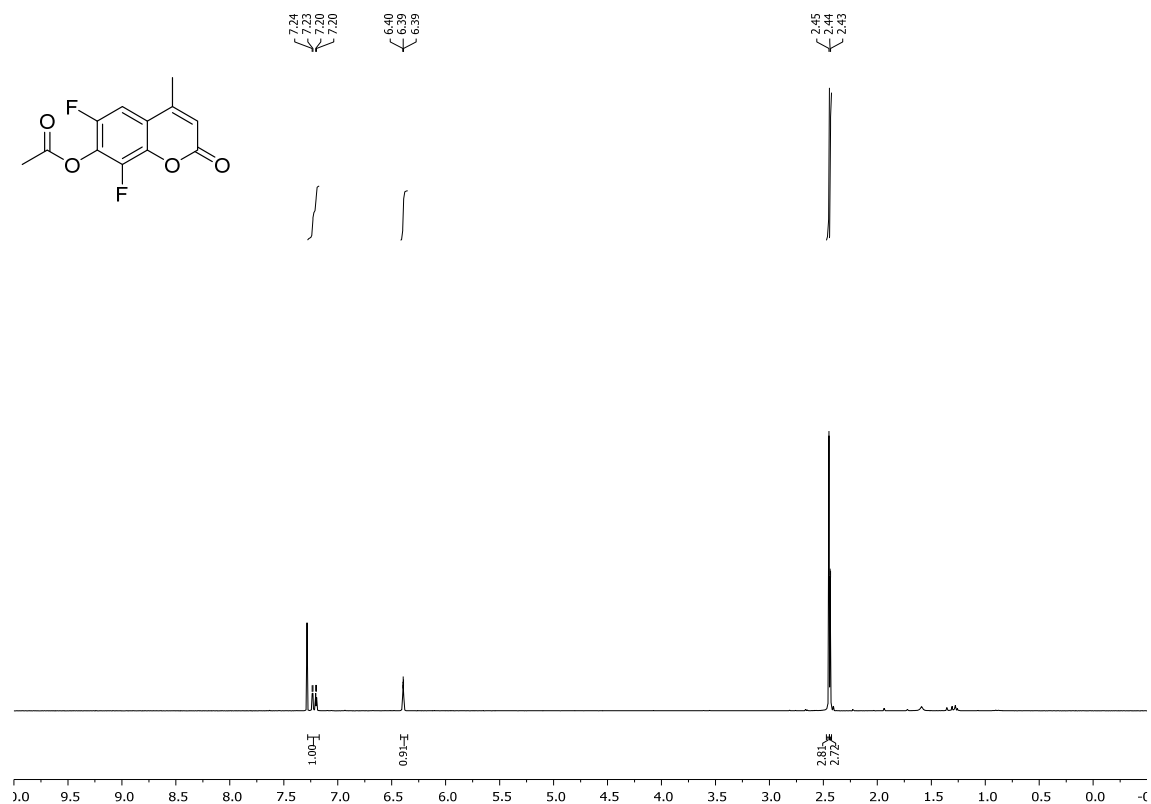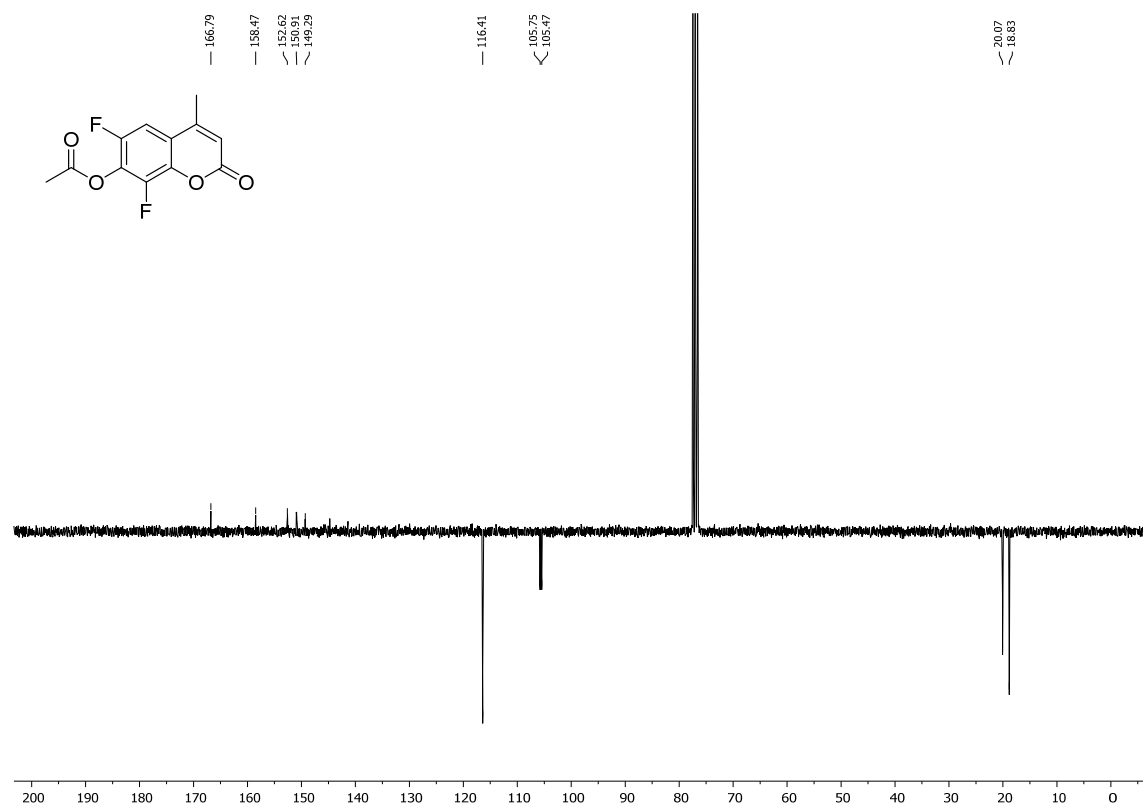

# LC-MS of synthesized compounds

## Compound JYQ-88: LC-MS

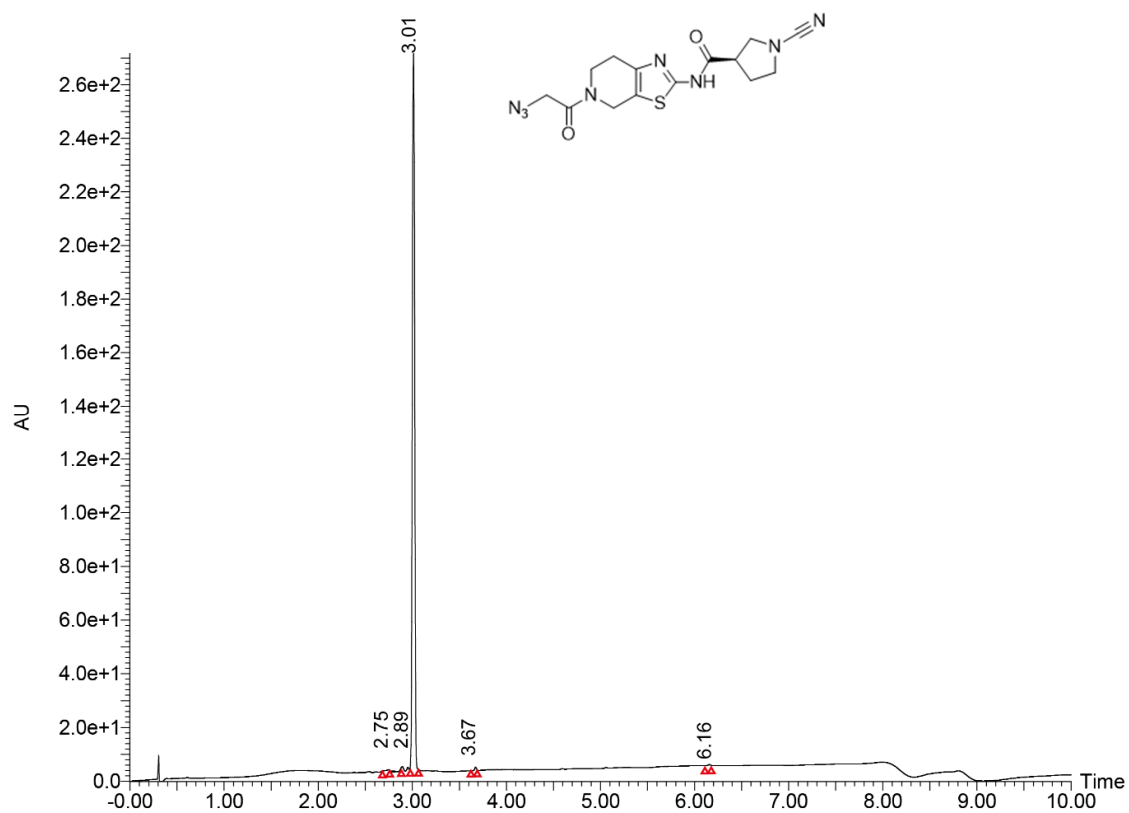

| Peak | RT[min] | Height    | Area       | Area% |
|------|---------|-----------|------------|-------|
| 1    | 2.75    | 705504    | 50030.93   | 0.63  |
| 2    | 2.89    | 1641100   | 54265.17   | 0.68  |
| 3    | 3.01    | 266186032 | 7810046.00 | 98.25 |
| 4    | 3.67    | 11399782  | 24787.54   | 0.31  |
| 5    | 6.16    | 392171    | 9632.46    | 0.12  |

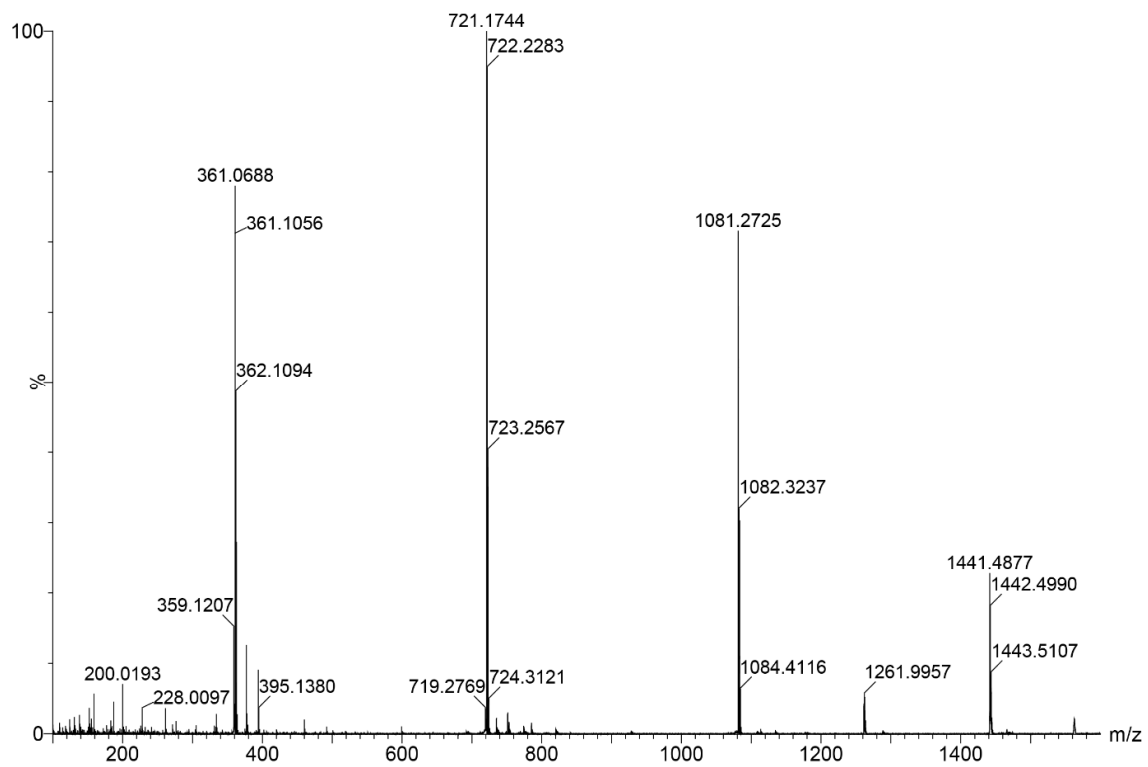

# Compound JYQ-92: LC-MS

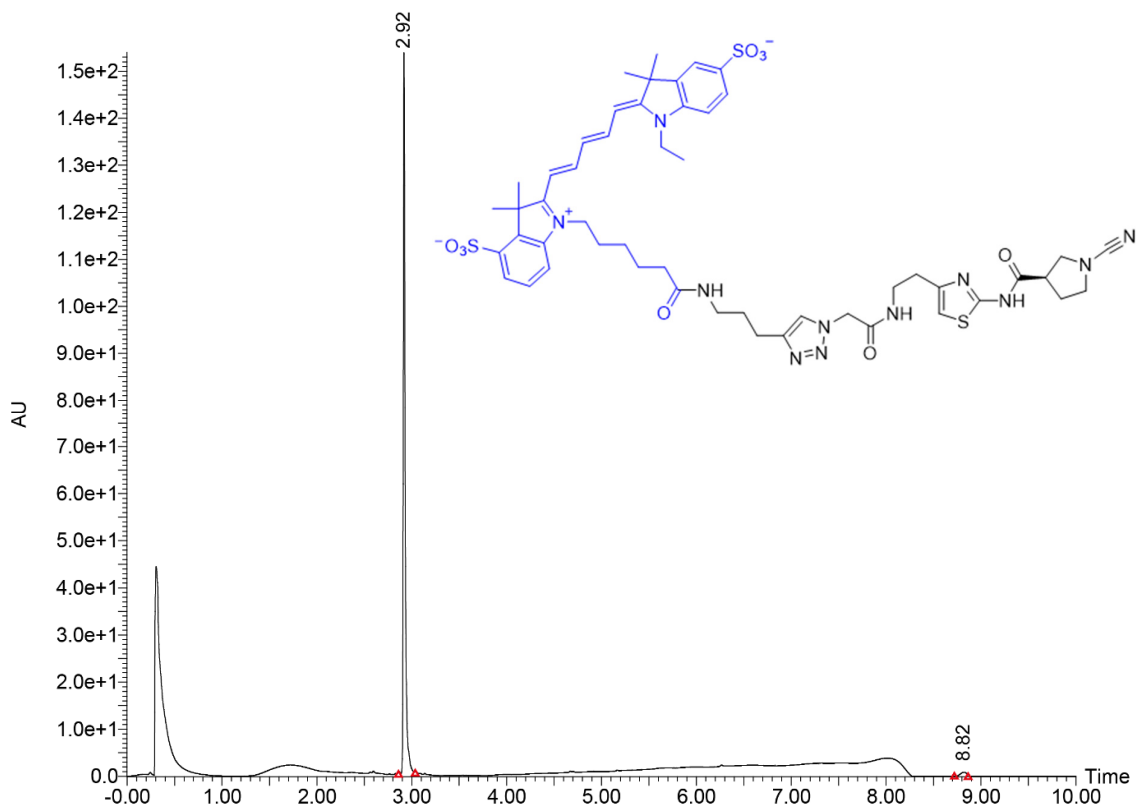

| Peak | RT[min] | Height    | Area       | Area% |
|------|---------|-----------|------------|-------|
| 1    | 2.92    | 153148480 | 3473224.25 | 98.28 |
| 2    | 8.82    | 78243     | 60647.19   | 1.72  |

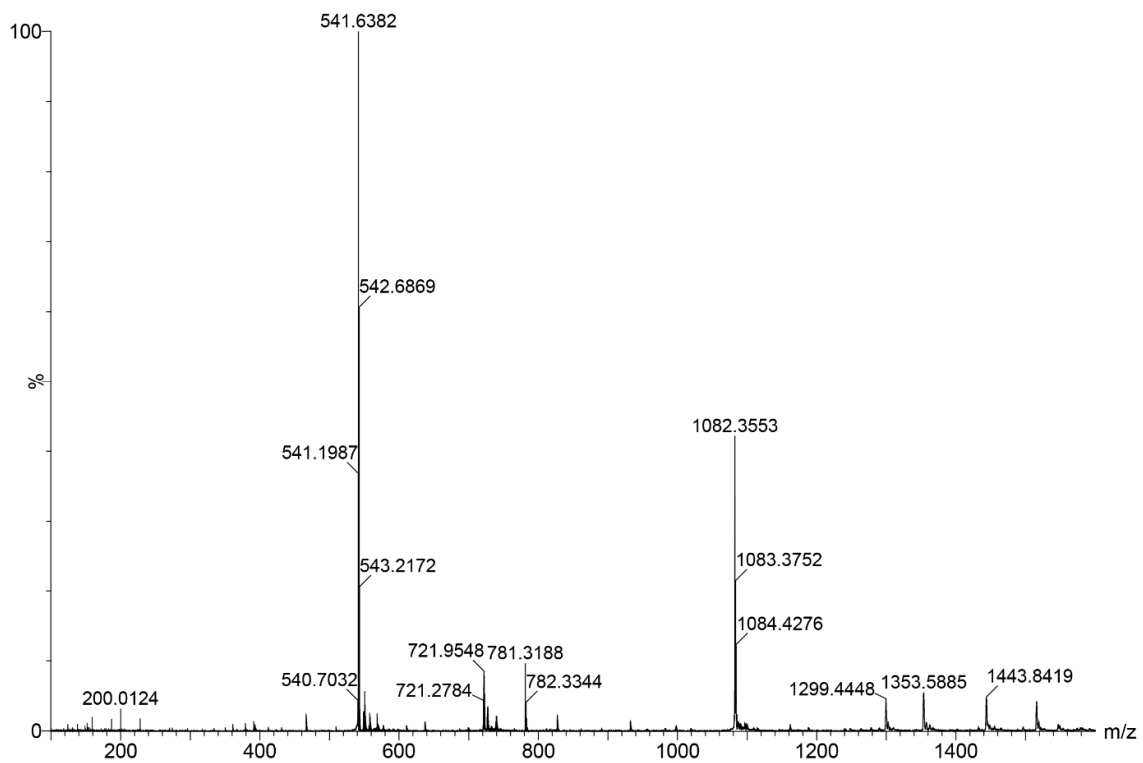

# Compound JYQ-93: LC-MS

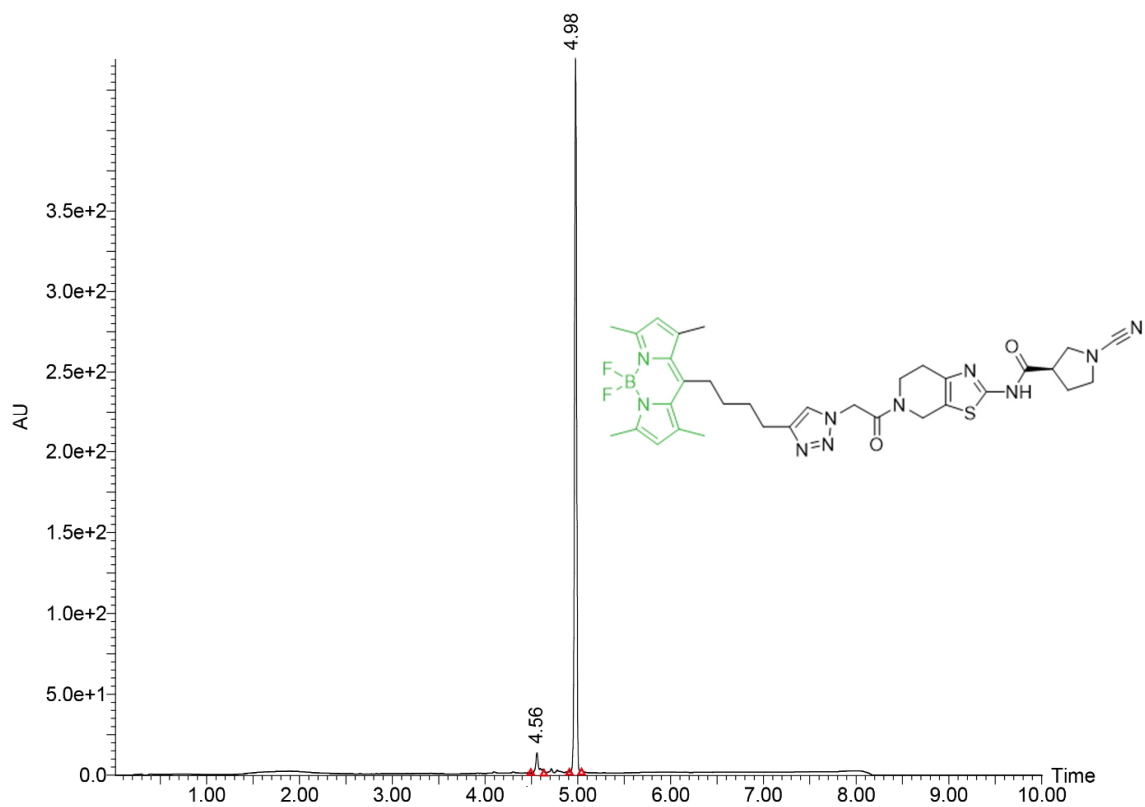

| Peak | RT[min] | Height    | Area        | Area% |
|------|---------|-----------|-------------|-------|
| 1    | 4.56    | 12353128  | 455077.31   | 3.72  |
| 2    | 4.71    | 2131677   | 44716.33    | 0.37  |
| 3    | 4.98    | 441885568 | 11721100.00 | 95.91 |

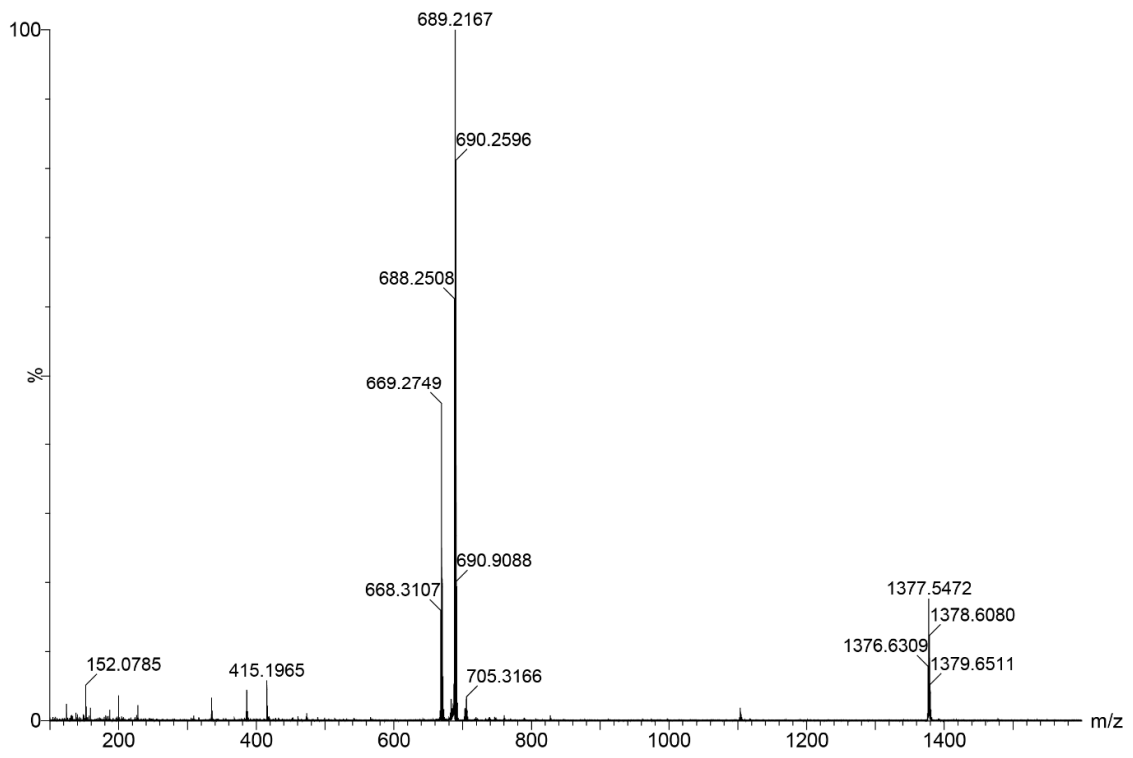



# Compound JYQ-107: LC-MS

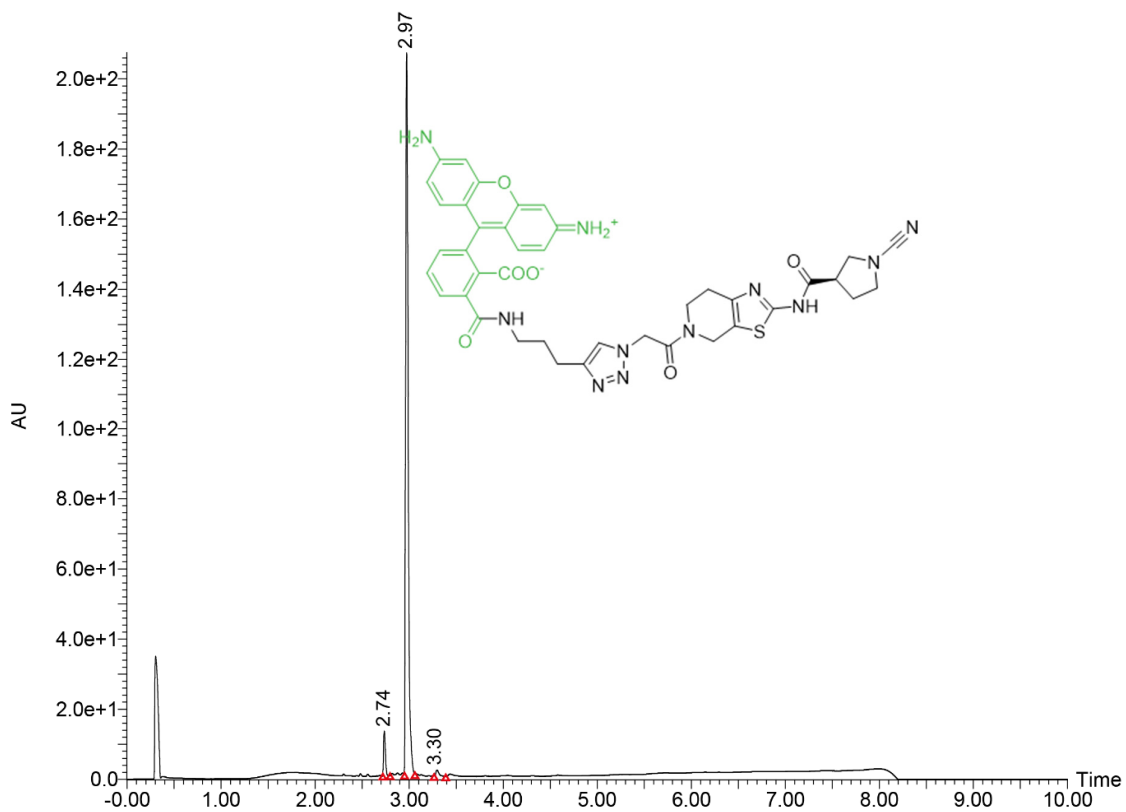

| Peak | RT[min] | Height    | Area       | Area% |
|------|---------|-----------|------------|-------|
| 1    | 2.74    | 12701791  | 287764.28  | 4.15  |
| 2    | 2.97    | 205910896 | 6588283.00 | 95.06 |
| 3    | 3.30    | 1656870   | 54917.12   | 0.79  |

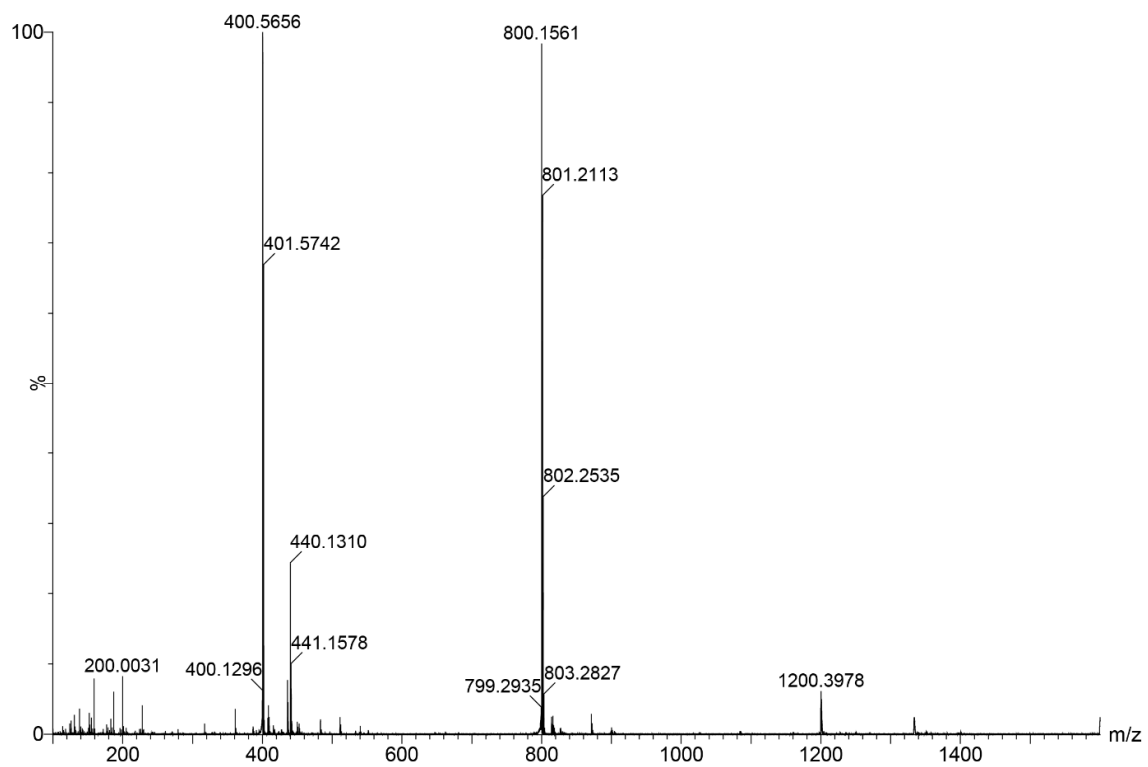

Supplement: jm2c01113_si_001.pdf [file jm2c01113_si_001.pdf]
